# Supplementary material
Source: PubMed Central journal article supplement (PMC3626493)
Supplement: NIHMS404949-supplement-01.pdf [file NIHMS404949-supplement-01.pdf]

SUPPLEMENTARY TABLE A.1

| Experiment <sup>a</sup> | Compound   | Compound<br>CAS # | Toxin      | Toxin                               | Compound                                 | Toxin                                    | Standard          |                        | Sample size <sup>g</sup> |
|-------------------------|------------|-------------------|------------|-------------------------------------|------------------------------------------|------------------------------------------|-------------------|------------------------|--------------------------|
|                         |            |                   |            | exposure<br>time (hrs) <sup>b</sup> | concentration<br>( $\mu$ M) <sup>c</sup> | concentration<br>( $\mu$ M) <sup>d</sup> | Mean <sup>e</sup> | Deviation <sup>f</sup> |                          |
| by compound             | fluoxetine | 56296-78-7        | neomycin   | 1                                   | 0                                        | 0                                        | 100.00            | 9.56                   | 11                       |
| by compound             | fluoxetine | 56296-78-7        | neomycin   | 1                                   | 0.5                                      | 0                                        | 101.49            | 18.36                  | 10                       |
| by compound             | fluoxetine | 56296-78-7        | neomycin   | 1                                   | 1                                        | 0                                        | 105.14            | 11.12                  | 10                       |
| by compound             | fluoxetine | 56296-78-7        | neomycin   | 1                                   | 5                                        | 0                                        | 103.92            | 10.51                  | 10                       |
| by compound             | fluoxetine | 56296-78-7        | neomycin   | 1                                   | 10                                       | 0                                        | 102.71            | 9.70                   | 10                       |
| by compound             | fluoxetine | 56296-78-7        | neomycin   | 1                                   | 50                                       | 0                                        | 91.16             | 14.89                  | 10                       |
| by compound             | fluoxetine | 56296-78-7        | neomycin   | 1                                   | 0                                        | 200                                      | 4.86              | 4.80                   | 10                       |
| by compound             | fluoxetine | 56296-78-7        | neomycin   | 1                                   | 0.5                                      | 200                                      | 5.47              | 6.69                   | 10                       |
| by compound             | fluoxetine | 56296-78-7        | neomycin   | 1                                   | 1                                        | 200                                      | 8.51              | 9.15                   | 10                       |
| by compound             | fluoxetine | 56296-78-7        | neomycin   | 1                                   | 5                                        | 200                                      | 21.88             | 8.69                   | 10                       |
| by compound             | fluoxetine | 56296-78-7        | neomycin   | 1                                   | 10                                       | 200                                      | 31.60             | 10.65                  | 10                       |
| by compound             | fluoxetine | 56296-78-7        | neomycin   | 1                                   | 50                                       | 200                                      | 61.38             | 16.32                  | 10                       |
| by toxin                | fluoxetine | 56296-78-7        | neomycin   | 1                                   | 0                                        | 0                                        | 100.00            | 6.24                   | 10                       |
| by toxin                | fluoxetine | 56296-78-7        | neomycin   | 1                                   | 0                                        | 25                                       | 84.07             | 8.21                   | 10                       |
| by toxin                | fluoxetine | 56296-78-7        | neomycin   | 1                                   | 0                                        | 50                                       | 73.63             | 5.91                   | 10                       |
| by toxin                | fluoxetine | 56296-78-7        | neomycin   | 1                                   | 0                                        | 100                                      | 38.46             | 7.77                   | 10                       |
| by toxin                | fluoxetine | 56296-78-7        | neomycin   | 1                                   | 0                                        | 200                                      | 13.49             | 8.64                   | 11                       |
| by toxin                | fluoxetine | 56296-78-7        | neomycin   | 1                                   | 0                                        | 400                                      | 6.49              | 7.70                   | 11                       |
| by toxin                | fluoxetine | 56296-78-7        | neomycin   | 1                                   | 50                                       | 0                                        | 72.53             | 7.23                   | 10                       |
| by toxin                | fluoxetine | 56296-78-7        | neomycin   | 1                                   | 50                                       | 25                                       | 82.92             | 9.97                   | 11                       |
| by toxin                | fluoxetine | 56296-78-7        | neomycin   | 1                                   | 50                                       | 50                                       | 83.52             | 8.90                   | 10                       |
| by toxin                | fluoxetine | 56296-78-7        | neomycin   | 1                                   | 50                                       | 100                                      | 53.85             | 9.27                   | 10                       |
| by toxin                | fluoxetine | 56296-78-7        | neomycin   | 1                                   | 50                                       | 200                                      | 44.51             | 7.53                   | 10                       |
| by toxin                | fluoxetine | 56296-78-7        | neomycin   | 1                                   | 50                                       | 400                                      | 42.31             | 9.71                   | 10                       |
| by compound             | fluoxetine | 56296-78-7        | gentamicin | 6                                   | 0                                        | 0                                        | 100.00            | 11.38                  | 10                       |
| by compound             | fluoxetine | 56296-78-7        | gentamicin | 6                                   | 10                                       | 0                                        | 105.78            | 7.73                   | 10                       |
| by compound             | fluoxetine | 56296-78-7        | gentamicin | 6                                   | 25                                       | 0                                        | 79.19             | 15.31                  | 10                       |
| by compound             | fluoxetine | 56296-78-7        | gentamicin | 6                                   | 35                                       | 0                                        | 60.12             | 12.44                  | 10                       |
| by compound             | fluoxetine | 56296-78-7        | gentamicin | 6                                   | 50                                       | 0                                        | 44.51             | 16.33                  | 10                       |
| by compound             | fluoxetine | 56296-78-7        | gentamicin | 6                                   | 0                                        | 50                                       | 24.70             | 11.14                  | 11                       |
| by compound             | fluoxetine | 56296-78-7        | gentamicin | 6                                   | 10                                       | 50                                       | 21.97             | 18.36                  | 10                       |
| by compound             | fluoxetine | 56296-78-7        | gentamicin | 6                                   | 25                                       | 50                                       | 2.10              | 4.06                   | 11                       |
| by compound             | fluoxetine | 56296-78-7        | gentamicin | 6                                   | 35                                       | 50                                       | 14.71             | 10.56                  | 11                       |
| by compound             | fluoxetine | 56296-78-7        | gentamicin | 6                                   | 50                                       | 50                                       | 14.13             | 13.84                  | 9                        |
| by toxin                | fluoxetine | 56296-78-7        | gentamicin | 1                                   | 0                                        | 0                                        | 100.00            | 7.00                   | 10                       |
| by toxin                | fluoxetine | 56296-78-7        | gentamicin | 1                                   | 0                                        | 25                                       | 96.82             | 5.16                   | 9                        |
| by toxin                | fluoxetine | 56296-78-7        | gentamicin | 1                                   | 0                                        | 50                                       | 66.67             | 8.36                   | 10                       |
| by toxin                | fluoxetine | 56296-78-7        | gentamicin | 1                                   | 0                                        | 100                                      | 45.03             | 9.57                   | 10                       |
| by toxin                | fluoxetine | 56296-78-7        | gentamicin | 1                                   | 0                                        | 200                                      | 42.24             | 8.66                   | 9                        |
| by toxin                | fluoxetine | 56296-78-7        | gentamicin | 1                                   | 0                                        | 400                                      | 33.92             | 6.04                   | 10                       |
| by toxin                | fluoxetine | 56296-78-7        | gentamicin | 1                                   | 50                                       | 0                                        | 98.35             | 7.31                   | 11                       |
| by toxin                | fluoxetine | 56296-78-7        | gentamicin | 1                                   | 50                                       | 25                                       | 99.42             | 7.40                   | 11                       |
| by toxin                | fluoxetine | 56296-78-7        | gentamicin | 1                                   | 50                                       | 50                                       | 105.91            | 4.57                   | 9                        |
| by toxin                | fluoxetine | 56296-78-7        | gentamicin | 1                                   | 50                                       | 100                                      | 84.21             | 11.76                  | 10                       |
| by toxin                | fluoxetine | 56296-78-7        | gentamicin | 1                                   | 50                                       | 200                                      | 71.64             | 10.62                  | 12                       |
| by toxin                | fluoxetine | 56296-78-7        | gentamicin | 1                                   | 50                                       | 400                                      | 54.97             | 11.10                  | 10                       |
| by compound             | fluoxetine | 56296-78-7        | kanamycin  | 24                                  | 0                                        | 0                                        | 100.00            | 7.27                   | 10                       |
| by compound             | fluoxetine | 56296-78-7        | kanamycin  | 24                                  | 0.5                                      | 0                                        | 101.72            | 6.66                   | 10                       |
| by compound             | fluoxetine | 56296-78-7        | kanamycin  | 24                                  | 1                                        | 0                                        | 97.70             | 4.69                   | 10                       |
| by compound             | fluoxetine | 56296-78-7        | kanamycin  | 24                                  | 5                                        | 0                                        | 83.91             | 8.65                   | 10                       |
| by compound             | fluoxetine | 56296-78-7        | kanamycin  | 24                                  | 10                                       | 0                                        | 98.85             | 4.53                   | 10                       |
| by compound             | fluoxetine | 56296-78-7        | kanamycin  | 24                                  | 0                                        | 400                                      | 37.36             | 13.06                  | 10                       |
| by compound             | fluoxetine | 56296-78-7        | kanamycin  | 24                                  | 0.5                                      | 400                                      | 36.21             | 10.51                  | 10                       |
| by compound             | fluoxetine | 56296-78-7        | kanamycin  | 24                                  | 1                                        | 400                                      | 45.26             | 5.70                   | 8                        |
| by compound             | fluoxetine | 56296-78-7        | kanamycin  | 24                                  | 5                                        | 400                                      | 36.78             | 7.76                   | 10                       |
| by compound             | fluoxetine | 56296-78-7        | kanamycin  | 24                                  | 10                                       | 400                                      | 10.92             | 12.25                  | 10                       |
| by compound             | fluoxetine | 56296-78-7        | cisplatin  | 24                                  | 0                                        | 0                                        | 100.00            | 5.19                   | 11                       |
| by compound             | fluoxetine | 56296-78-7        | cisplatin  | 24                                  | 0.5                                      | 0                                        | 102.78            | 6.00                   | 10                       |
| by compound             | fluoxetine | 56296-78-7        | cisplatin  | 24                                  | 1                                        | 0                                        | 105.00            | 6.11                   | 10                       |
| by compound             | fluoxetine | 56296-78-7        | cisplatin  | 24                                  | 5                                        | 0                                        | 103.33            | 5.37                   | 10                       |
| by compound             | fluoxetine | 56296-78-7        | cisplatin  | 24                                  | 10                                       | 0                                        | 89.44             | 12.13                  | 10                       |
| by compound             | fluoxetine | 56296-78-7        | cisplatin  | 24                                  | 0                                        | 50                                       | 1.11              | 2.34                   | 10                       |
| by compound             | fluoxetine | 56296-78-7        | cisplatin  | 24                                  | 0.5                                      | 50                                       | 18.89             | 10.54                  | 10                       |
| by compound             | fluoxetine | 56296-78-7        | cisplatin  | 24                                  | 1                                        | 50                                       | 2.78              | 5.40                   | 10                       |
| by compound             | fluoxetine | 56296-78-7        | cisplatin  | 24                                  | 5                                        | 50                                       | 12.22             | 10.41                  | 10                       |
| by compound             | fluoxetine | 56296-78-7        | cisplatin  | 24                                  | 10                                       | 50                                       | 2.78              | 4.72                   | 10                       |

| Experiment <sup>a</sup> | Compound | Compound<br>CAS # | Toxin      | Toxin                               | Compound                                 | Toxin                                    | Standard          |                        |                          |
|-------------------------|----------|-------------------|------------|-------------------------------------|------------------------------------------|------------------------------------------|-------------------|------------------------|--------------------------|
|                         |          |                   |            | exposure<br>time (hrs) <sup>b</sup> | concentration<br>( $\mu$ M) <sup>c</sup> | concentration<br>( $\mu$ M) <sup>d</sup> | Mean <sup>e</sup> | Deviation <sup>f</sup> | Sample size <sup>g</sup> |
| by compound             | benzamil | 161804-20-2       | neomycin   | 1                                   | 0                                        | 0                                        | 100.00            | 7.86                   | 10                       |
| by compound             | benzamil | 161804-20-2       | neomycin   | 1                                   | 0.5                                      | 0                                        | 91.57             | 9.57                   | 10                       |
| by compound             | benzamil | 161804-20-2       | neomycin   | 1                                   | 1                                        | 0                                        | 93.26             | 11.30                  | 10                       |
| by compound             | benzamil | 161804-20-2       | neomycin   | 1                                   | 5                                        | 0                                        | 97.75             | 8.46                   | 10                       |
| by compound             | benzamil | 161804-20-2       | neomycin   | 1                                   | 10                                       | 0                                        | 98.88             | 8.03                   | 10                       |
| by compound             | benzamil | 161804-20-2       | neomycin   | 1                                   | 50                                       | 0                                        | 97.19             | 7.97                   | 10                       |
| by compound             | benzamil | 161804-20-2       | neomycin   | 1                                   | 100                                      | 0                                        | 98.88             | 8.46                   | 10                       |
| by compound             | benzamil | 161804-20-2       | neomycin   | 1                                   | 0                                        | 200                                      | 6.18              | 4.92                   | 10                       |
| by compound             | benzamil | 161804-20-2       | neomycin   | 1                                   | 0.5                                      | 200                                      | 9.19              | 18.26                  | 11                       |
| by compound             | benzamil | 161804-20-2       | neomycin   | 1                                   | 1                                        | 200                                      | 7.87              | 7.62                   | 10                       |
| by compound             | benzamil | 161804-20-2       | neomycin   | 1                                   | 5                                        | 200                                      | 25.84             | 10.56                  | 10                       |
| by compound             | benzamil | 161804-20-2       | neomycin   | 1                                   | 10                                       | 200                                      | 43.26             | 10.39                  | 10                       |
| by compound             | benzamil | 161804-20-2       | neomycin   | 1                                   | 50                                       | 200                                      | 93.26             | 8.26                   | 10                       |
| by compound             | benzamil | 161804-20-2       | neomycin   | 1                                   | 100                                      | 200                                      | 101.69            | 8.66                   | 10                       |
| by toxin                | benzamil | 161804-20-2       | neomycin   | 1                                   | 0                                        | 0                                        | 100.00            | 7.56                   | 10                       |
| by toxin                | benzamil | 161804-20-2       | neomycin   | 1                                   | 0                                        | 25                                       | 86.44             | 7.07                   | 10                       |
| by toxin                | benzamil | 161804-20-2       | neomycin   | 1                                   | 0                                        | 50                                       | 44.07             | 9.53                   | 10                       |
| by toxin                | benzamil | 161804-20-2       | neomycin   | 1                                   | 0                                        | 100                                      | 20.90             | 10.67                  | 10                       |
| by toxin                | benzamil | 161804-20-2       | neomycin   | 1                                   | 0                                        | 200                                      | 1.69              | 3.81                   | 10                       |
| by toxin                | benzamil | 161804-20-2       | neomycin   | 1                                   | 0                                        | 400                                      | 1.54              | 3.65                   | 11                       |
| by toxin                | benzamil | 161804-20-2       | neomycin   | 1                                   | 50                                       | 0                                        | 104.52            | 6.66                   | 10                       |
| by toxin                | benzamil | 161804-20-2       | neomycin   | 1                                   | 50                                       | 25                                       | 102.26            | 7.27                   | 10                       |
| by toxin                | benzamil | 161804-20-2       | neomycin   | 1                                   | 50                                       | 50                                       | 103.39            | 7.56                   | 10                       |
| by toxin                | benzamil | 161804-20-2       | neomycin   | 1                                   | 50                                       | 100                                      | 97.74             | 11.62                  | 10                       |
| by toxin                | benzamil | 161804-20-2       | neomycin   | 1                                   | 50                                       | 200                                      | 89.83             | 4.95                   | 10                       |
| by toxin                | benzamil | 161804-20-2       | neomycin   | 1                                   | 50                                       | 400                                      | 86.29             | 13.15                  | 11                       |
| by compound             | benzamil | 161804-20-2       | gentamicin | 6                                   | 0                                        | 0                                        | 100.00            | 7.13                   | 10                       |
| by compound             | benzamil | 161804-20-2       | gentamicin | 6                                   | 0.5                                      | 0                                        | 100.57            | 10.66                  | 10                       |
| by compound             | benzamil | 161804-20-2       | gentamicin | 6                                   | 1                                        | 0                                        | 96.00             | 9.84                   | 10                       |
| by compound             | benzamil | 161804-20-2       | gentamicin | 6                                   | 5                                        | 0                                        | 97.14             | 4.59                   | 10                       |
| by compound             | benzamil | 161804-20-2       | gentamicin | 6                                   | 10                                       | 0                                        | 102.29            | 9.34                   | 10                       |
| by compound             | benzamil | 161804-20-2       | gentamicin | 6                                   | 50                                       | 0                                        | 103.43            | 7.70                   | 10                       |
| by compound             | benzamil | 161804-20-2       | gentamicin | 6                                   | 100                                      | 0                                        | 102.29            | 9.34                   | 10                       |
| by compound             | benzamil | 161804-20-2       | gentamicin | 6                                   | 0                                        | 200                                      | 0.57              | 1.81                   | 10                       |
| by compound             | benzamil | 161804-20-2       | gentamicin | 6                                   | 0.5                                      | 200                                      | 0.57              | 1.80                   | 10                       |
| by compound             | benzamil | 161804-20-2       | gentamicin | 6                                   | 1                                        | 200                                      | 0.00              | 0.00                   | 10                       |
| by compound             | benzamil | 161804-20-2       | gentamicin | 6                                   | 5                                        | 200                                      | 5.14              | 8.96                   | 10                       |
| by compound             | benzamil | 161804-20-2       | gentamicin | 6                                   | 10                                       | 200                                      | 41.14             | 9.42                   | 10                       |
| by compound             | benzamil | 161804-20-2       | gentamicin | 6                                   | 50                                       | 200                                      | 93.14             | 7.39                   | 10                       |
| by compound             | benzamil | 161804-20-2       | gentamicin | 6                                   | 100                                      | 200                                      | 100.32            | 9.31                   | 9                        |
| by toxin                | benzamil | 161804-20-2       | gentamicin | 6                                   | 0                                        | 0                                        | 100.00            | 6.08                   | 7                        |
| by toxin                | benzamil | 161804-20-2       | gentamicin | 6                                   | 0                                        | 25                                       | 46.09             | 7.64                   | 7                        |
| by toxin                | benzamil | 161804-20-2       | gentamicin | 6                                   | 0                                        | 50                                       | 28.71             | 5.66                   | 8                        |
| by toxin                | benzamil | 161804-20-2       | gentamicin | 6                                   | 0                                        | 100                                      | 2.05              | 4.07                   | 8                        |
| by toxin                | benzamil | 161804-20-2       | gentamicin | 6                                   | 0                                        | 200                                      | 1.37              | 3.87                   | 8                        |
| by toxin                | benzamil | 161804-20-2       | gentamicin | 6                                   | 0                                        | 400                                      | 0.68              | 1.93                   | 8                        |
| by toxin                | benzamil | 161804-20-2       | gentamicin | 6                                   | 50                                       | 0                                        | 94.34             | 5.66                   | 8                        |
| by toxin                | benzamil | 161804-20-2       | gentamicin | 6                                   | 50                                       | 25                                       | 103.91            | 5.99                   | 6                        |
| by toxin                | benzamil | 161804-20-2       | gentamicin | 6                                   | 50                                       | 50                                       | 100.00            | 6.85                   | 7                        |
| by toxin                | benzamil | 161804-20-2       | gentamicin | 6                                   | 50                                       | 100                                      | 101.86            | 10.10                  | 8                        |
| by toxin                | benzamil | 161804-20-2       | gentamicin | 6                                   | 50                                       | 200                                      | 95.31             | 6.96                   | 7                        |
| by toxin                | benzamil | 161804-20-2       | gentamicin | 6                                   | 50                                       | 400                                      | 79.69             | 33.53                  | 7                        |
| by compound             | benzamil | 161804-20-2       | kanamycin  | 24                                  | 0                                        | 0                                        | 100.00            | 6.38                   | 11                       |
| by compound             | benzamil | 161804-20-2       | kanamycin  | 24                                  | 0.5                                      | 0                                        | 101.02            | 6.38                   | 11                       |
| by compound             | benzamil | 161804-20-2       | kanamycin  | 24                                  | 1                                        | 0                                        | 96.95             | 5.19                   | 11                       |
| by compound             | benzamil | 161804-20-2       | kanamycin  | 24                                  | 5                                        | 0                                        | 103.30            | 5.46                   | 10                       |
| by compound             | benzamil | 161804-20-2       | kanamycin  | 24                                  | 10                                       | 0                                        | 97.16             | 7.58                   | 10                       |
| by compound             | benzamil | 161804-20-2       | kanamycin  | 24                                  | 50                                       | 0                                        | 104.97            | 4.43                   | 10                       |
| by compound             | benzamil | 161804-20-2       | kanamycin  | 24                                  | 100                                      | 0                                        | 102.37            | 6.28                   | 9                        |
| by compound             | benzamil | 161804-20-2       | kanamycin  | 24                                  | 0                                        | 400                                      | 45.18             | 9.82                   | 11                       |
| by compound             | benzamil | 161804-20-2       | kanamycin  | 24                                  | 0.5                                      | 400                                      | 44.11             | 8.82                   | 10                       |
| by compound             | benzamil | 161804-20-2       | kanamycin  | 24                                  | 1                                        | 400                                      | 39.09             | 9.40                   | 10                       |
| by compound             | benzamil | 161804-20-2       | kanamycin  | 24                                  | 5                                        | 400                                      | 39.64             | 6.96                   | 10                       |
| by compound             | benzamil | 161804-20-2       | kanamycin  | 24                                  | 10                                       | 400                                      | 42.44             | 7.76                   | 10                       |
| by compound             | benzamil | 161804-20-2       | kanamycin  | 24                                  | 50                                       | 400                                      | 93.06             | 18.23                  | 9                        |
| by compound             | benzamil | 161804-20-2       | kanamycin  | 24                                  | 100                                      | 400                                      | 101.62            | 9.20                   | 10                       |
| by toxin                | benzamil | 161804-20-2       | kanamycin  | 24                                  | 0                                        | 0                                        | 100.00            | 6.34                   | 10                       |
| by toxin                | benzamil | 161804-20-2       | kanamycin  | 24                                  | 0                                        | 25                                       | 97.81             | 7.49                   | 10                       |

| Experiment <sup>a</sup> | Compound     | Compound    |            | Toxin exposure          | Compound concentration  | Toxin concentration     | Standard          |                        |                          |
|-------------------------|--------------|-------------|------------|-------------------------|-------------------------|-------------------------|-------------------|------------------------|--------------------------|
|                         |              | CAS #       | Toxin      | time (hrs) <sup>b</sup> | ( $\mu$ M) <sup>c</sup> | ( $\mu$ M) <sup>d</sup> | Mean <sup>e</sup> | Deviation <sup>f</sup> | Sample size <sup>g</sup> |
| by toxin                | benzamil     | 161804-20-2 | kanamycin  | 24                      | 0                       | 50                      | 91.26             | 5.79                   | 10                       |
| by toxin                | benzamil     | 161804-20-2 | kanamycin  | 24                      | 0                       | 100                     | 84.70             | 7.83                   | 10                       |
| by toxin                | benzamil     | 161804-20-2 | kanamycin  | 24                      | 0                       | 200                     | 59.02             | 9.91                   | 10                       |
| by toxin                | benzamil     | 161804-20-2 | kanamycin  | 24                      | 0                       | 400                     | 37.70             | 7.92                   | 10                       |
| by toxin                | benzamil     | 161804-20-2 | kanamycin  | 24                      | 50                      | 0                       | 91.80             | 5.64                   | 10                       |
| by toxin                | benzamil     | 161804-20-2 | kanamycin  | 24                      | 50                      | 25                      | 101.09            | 5.90                   | 10                       |
| by toxin                | benzamil     | 161804-20-2 | kanamycin  | 24                      | 50                      | 50                      | 100.55            | 5.28                   | 10                       |
| by toxin                | benzamil     | 161804-20-2 | kanamycin  | 24                      | 50                      | 100                     | 100.00            | 8.17                   | 10                       |
| by toxin                | benzamil     | 161804-20-2 | kanamycin  | 24                      | 50                      | 200                     | 93.99             | 8.47                   | 10                       |
| by toxin                | benzamil     | 161804-20-2 | kanamycin  | 24                      | 50                      | 400                     | 92.90             | 8.54                   | 10                       |
| by compound             | benzamil     | 161804-20-2 | cisplatin  | 24                      | 0                       | 0                       | 100.00            | 5.19                   | 10                       |
| by compound             | benzamil     | 161804-20-2 | cisplatin  | 24                      | 0.5                     | 0                       | 96.18             | 8.69                   | 9                        |
| by compound             | benzamil     | 161804-20-2 | cisplatin  | 24                      | 1                       | 0                       | 93.55             | 7.69                   | 10                       |
| by compound             | benzamil     | 161804-20-2 | cisplatin  | 24                      | 5                       | 0                       | 98.92             | 5.19                   | 10                       |
| by compound             | benzamil     | 161804-20-2 | cisplatin  | 24                      | 10                      | 0                       | 97.85             | 10.07                  | 10                       |
| by compound             | benzamil     | 161804-20-2 | cisplatin  | 24                      | 50                      | 0                       | 95.16             | 6.23                   | 10                       |
| by compound             | benzamil     | 161804-20-2 | cisplatin  | 24                      | 100                     | 0                       | 99.46             | 9.23                   | 10                       |
| by compound             | benzamil     | 161804-20-2 | cisplatin  | 24                      | 0                       | 50                      | 11.29             | 10.89                  | 10                       |
| by compound             | benzamil     | 161804-20-2 | cisplatin  | 24                      | 0.5                     | 50                      | 19.35             | 10.81                  | 10                       |
| by compound             | benzamil     | 161804-20-2 | cisplatin  | 24                      | 1                       | 50                      | 13.98             | 6.80                   | 10                       |
| by compound             | benzamil     | 161804-20-2 | cisplatin  | 24                      | 5                       | 50                      | 25.27             | 9.50                   | 10                       |
| by compound             | benzamil     | 161804-20-2 | cisplatin  | 24                      | 10                      | 50                      | 23.12             | 11.06                  | 10                       |
| by compound             | benzamil     | 161804-20-2 | cisplatin  | 24                      | 50                      | 50                      | 91.40             | 13.97                  | 9                        |
| by compound             | benzamil     | 161804-20-2 | cisplatin  | 24                      | 100                     | 50                      | 102.15            | 5.07                   | 10                       |
| by toxin                | benzamil     | 161804-20-2 | cisplatin  | 24                      | 0                       | 0                       | 100.00            | 5.27                   | 11                       |
| by toxin                | benzamil     | 161804-20-2 | cisplatin  | 24                      | 0                       | 5                       | 94.92             | 5.32                   | 12                       |
| by toxin                | benzamil     | 161804-20-2 | cisplatin  | 24                      | 0                       | 10                      | 88.22             | 7.81                   | 10                       |
| by toxin                | benzamil     | 161804-20-2 | cisplatin  | 24                      | 0                       | 25                      | 44.20             | 7.32                   | 12                       |
| by toxin                | benzamil     | 161804-20-2 | cisplatin  | 24                      | 0                       | 50                      | 16.75             | 9.67                   | 9                        |
| by toxin                | benzamil     | 161804-20-2 | cisplatin  | 24                      | 0                       | 100                     | 1.68              | 3.77                   | 10                       |
| by toxin                | benzamil     | 161804-20-2 | cisplatin  | 24                      | 50                      | 0                       | 92.69             | 7.98                   | 10                       |
| by toxin                | benzamil     | 161804-20-2 | cisplatin  | 24                      | 50                      | 5                       | 103.55            | 6.78                   | 11                       |
| by toxin                | benzamil     | 161804-20-2 | cisplatin  | 24                      | 50                      | 10                      | 103.55            | 8.04                   | 11                       |
| by toxin                | benzamil     | 161804-20-2 | cisplatin  | 24                      | 50                      | 25                      | 101.75            | 7.79                   | 9                        |
| by toxin                | benzamil     | 161804-20-2 | cisplatin  | 24                      | 50                      | 50                      | 96.95             | 6.73                   | 11                       |
| by toxin                | benzamil     | 161804-20-2 | cisplatin  | 24                      | 50                      | 100                     | 46.35             | 8.34                   | 10                       |
| by compound             | fluspirilene | 1841-19-6   | neomycin   | 1                       | 0                       | 0                       | 100.00            | 22.84                  | 11                       |
| by compound             | fluspirilene | 1841-19-6   | neomycin   | 1                       | 0.5                     | 0                       | 109.39            | 9.36                   | 10                       |
| by compound             | fluspirilene | 1841-19-6   | neomycin   | 1                       | 1                       | 0                       | 98.94             | 15.99                  | 10                       |
| by compound             | fluspirilene | 1841-19-6   | neomycin   | 1                       | 5                       | 0                       | 101.12            | 16.01                  | 11                       |
| by compound             | fluspirilene | 1841-19-6   | neomycin   | 1                       | 10                      | 0                       | 102.01            | 18.72                  | 10                       |
| by compound             | fluspirilene | 1841-19-6   | neomycin   | 1                       | 0                       | 200                     | 12.29             | 6.67                   | 10                       |
| by compound             | fluspirilene | 1841-19-6   | neomycin   | 1                       | 0.5                     | 200                     | 12.91             | 8.38                   | 10                       |
| by compound             | fluspirilene | 1841-19-6   | neomycin   | 1                       | 1                       | 200                     | 17.82             | 14.28                  | 10                       |
| by compound             | fluspirilene | 1841-19-6   | neomycin   | 1                       | 5                       | 200                     | 42.40             | 9.61                   | 10                       |
| by compound             | fluspirilene | 1841-19-6   | neomycin   | 1                       | 10                      | 200                     | 62.68             | 10.83                  | 10                       |
| by toxin                | fluspirilene | 1841-19-6   | neomycin   | 1                       | 0                       | 0                       | 100.00            | 5.45                   | 9                        |
| by toxin                | fluspirilene | 1841-19-6   | neomycin   | 1                       | 0                       | 25                      | 98.53             | 7.54                   | 8                        |
| by toxin                | fluspirilene | 1841-19-6   | neomycin   | 1                       | 0                       | 50                      | 47.79             | 6.62                   | 8                        |
| by toxin                | fluspirilene | 1841-19-6   | neomycin   | 1                       | 0                       | 100                     | 16.18             | 10.78                  | 8                        |
| by toxin                | fluspirilene | 1841-19-6   | neomycin   | 1                       | 0                       | 200                     | 7.35              | 6.85                   | 8                        |
| by toxin                | fluspirilene | 1841-19-6   | neomycin   | 1                       | 0                       | 400                     | 2.21              | 4.38                   | 8                        |
| by toxin                | fluspirilene | 1841-19-6   | neomycin   | 1                       | 10                      | 0                       | 110.29            | 6.09                   | 8                        |
| by toxin                | fluspirilene | 1841-19-6   | neomycin   | 1                       | 10                      | 25                      | 108.40            | 5.74                   | 7                        |
| by toxin                | fluspirilene | 1841-19-6   | neomycin   | 1                       | 10                      | 50                      | 106.72            | 7.91                   | 7                        |
| by toxin                | fluspirilene | 1841-19-6   | neomycin   | 1                       | 10                      | 100                     | 107.35            | 7.54                   | 8                        |
| by toxin                | fluspirilene | 1841-19-6   | neomycin   | 1                       | 10                      | 200                     | 100.00            | 5.45                   | 8                        |
| by toxin                | fluspirilene | 1841-19-6   | neomycin   | 1                       | 10                      | 400                     | 98.53             | 8.17                   | 8                        |
| by compound             | fluspirilene | 1841-19-6   | gentamicin | 6                       | 0                       | 0                       | 100.00            | 4.54                   | 11                       |
| by compound             | fluspirilene | 1841-19-6   | gentamicin | 6                       | 0.5                     | 0                       | 91.38             | 13.84                  | 10                       |
| by compound             | fluspirilene | 1841-19-6   | gentamicin | 6                       | 1                       | 0                       | 102.10            | 8.81                   | 10                       |
| by compound             | fluspirilene | 1841-19-6   | gentamicin | 6                       | 0                       | 200                     | 0.51              | 1.74                   | 11                       |
| by compound             | fluspirilene | 1841-19-6   | gentamicin | 6                       | 0.5                     | 200                     | 6.77              | 7.11                   | 10                       |
| by compound             | fluspirilene | 1841-19-6   | gentamicin | 6                       | 1                       | 200                     | 4.51              | 4.56                   | 10                       |
| by compound             | fluspirilene | 1841-19-6   | gentamicin | 1                       | 0                       | 0                       | 100.00            | 5.45                   | 9                        |
| by compound             | fluspirilene | 1841-19-6   | gentamicin | 1                       | 0.5                     | 0                       | 103.68            | 7.66                   | 8                        |
| by compound             | fluspirilene | 1841-19-6   | gentamicin | 1                       | 1                       | 0                       | 97.79             | 6.99                   | 8                        |

| Experiment <sup>a</sup> | Compound     | Compound   |            | Toxin exposure          | Compound concentration  | Toxin concentration     | Standard          |                        |                          |
|-------------------------|--------------|------------|------------|-------------------------|-------------------------|-------------------------|-------------------|------------------------|--------------------------|
|                         |              | CAS #      | Toxin      | time (hrs) <sup>b</sup> | ( $\mu$ M) <sup>c</sup> | ( $\mu$ M) <sup>d</sup> | Mean <sup>e</sup> | Deviation <sup>f</sup> | Sample size <sup>g</sup> |
| by compound             | fluspirilene | 1841-19-6  | gentamicin | 1                       | 5                       | 0                       | 99.26             | 4.91                   | 8                        |
| by compound             | fluspirilene | 1841-19-6  | gentamicin | 1                       | 10                      | 0                       | 110.29            | 6.09                   | 8                        |
| by compound             | fluspirilene | 1841-19-6  | gentamicin | 1                       | 0                       | 200                     | 47.06             | 7.70                   | 8                        |
| by compound             | fluspirilene | 1841-19-6  | gentamicin | 1                       | 0.5                     | 200                     | 41.18             | 4.45                   | 8                        |
| by compound             | fluspirilene | 1841-19-6  | gentamicin | 1                       | 1                       | 200                     | 54.41             | 12.48                  | 8                        |
| by compound             | fluspirilene | 1841-19-6  | gentamicin | 1                       | 5                       | 200                     | 98.53             | 8.75                   | 8                        |
| by compound             | fluspirilene | 1841-19-6  | gentamicin | 1                       | 10                      | 200                     | 105.15            | 9.66                   | 8                        |
| by toxin                | fluspirilene | 1841-19-6  | gentamicin | 1                       | 0                       | 0                       | 100.00            | 7.00                   | 10                       |
| by toxin                | fluspirilene | 1841-19-6  | gentamicin | 1                       | 0                       | 25                      | 96.82             | 5.16                   | 9                        |
| by toxin                | fluspirilene | 1841-19-6  | gentamicin | 1                       | 0                       | 50                      | 66.67             | 8.36                   | 10                       |
| by toxin                | fluspirilene | 1841-19-6  | gentamicin | 1                       | 0                       | 100                     | 45.03             | 9.57                   | 10                       |
| by toxin                | fluspirilene | 1841-19-6  | gentamicin | 1                       | 0                       | 200                     | 42.24             | 8.66                   | 9                        |
| by toxin                | fluspirilene | 1841-19-6  | gentamicin | 1                       | 0                       | 400                     | 33.92             | 6.04                   | 10                       |
| by toxin                | fluspirilene | 1841-19-6  | gentamicin | 1                       | 10                      | 0                       | 107.60            | 8.36                   | 10                       |
| by toxin                | fluspirilene | 1841-19-6  | gentamicin | 1                       | 10                      | 25                      | 112.28            | 5.37                   | 10                       |
| by toxin                | fluspirilene | 1841-19-6  | gentamicin | 1                       | 10                      | 50                      | 109.81            | 7.61                   | 9                        |
| by toxin                | fluspirilene | 1841-19-6  | gentamicin | 1                       | 10                      | 100                     | 101.17            | 8.74                   | 10                       |
| by compound             | fluspirilene | 1841-19-6  | kanamycin  | 24                      | 0                       | 0                       | 105.97            | 6.72                   | 11                       |
| by compound             | fluspirilene | 1841-19-6  | kanamycin  | 24                      | 0.1                     | 0                       | 99.52             | 6.91                   | 11                       |
| by compound             | fluspirilene | 1841-19-6  | kanamycin  | 24                      | 0.5                     | 0                       | 103.55            | 5.75                   | 10                       |
| by compound             | fluspirilene | 1841-19-6  | kanamycin  | 24                      | 1                       | 0                       | 110.06            | 6.95                   | 10                       |
| by compound             | fluspirilene | 1841-19-6  | kanamycin  | 24                      | 0                       | 400                     | 47.88             | 10.40                  | 11                       |
| by compound             | fluspirilene | 1841-19-6  | kanamycin  | 24                      | 0.1                     | 400                     | 42.60             | 5.44                   | 10                       |
| by compound             | fluspirilene | 1841-19-6  | kanamycin  | 24                      | 0.5                     | 400                     | 39.81             | 11.86                  | 11                       |
| by compound             | fluspirilene | 1841-19-6  | kanamycin  | 24                      | 1                       | 400                     | 50.30             | 7.51                   | 10                       |
| by compound             | fluspirilene | 1841-19-6  | cisplatin  | 24                      | 0                       | 0                       | 100.00            | 8.95                   | 11                       |
| by compound             | fluspirilene | 1841-19-6  | cisplatin  | 24                      | 0.1                     | 0                       | 107.19            | 7.17                   | 10                       |
| by compound             | fluspirilene | 1841-19-6  | cisplatin  | 24                      | 0.5                     | 0                       | 104.79            | 6.47                   | 11                       |
| by compound             | fluspirilene | 1841-19-6  | cisplatin  | 24                      | 1                       | 0                       | 105.99            | 4.04                   | 10                       |
| by compound             | fluspirilene | 1841-19-6  | cisplatin  | 24                      | 5                       | 0                       | 107.78            | 0.00                   | 10                       |
| by compound             | fluspirilene | 1841-19-6  | cisplatin  | 24                      | 0                       | 50                      | 1.20              | 2.52                   | 10                       |
| by compound             | fluspirilene | 1841-19-6  | cisplatin  | 24                      | 0.1                     | 50                      | 11.38             | 9.96                   | 10                       |
| by compound             | fluspirilene | 1841-19-6  | cisplatin  | 24                      | 0.5                     | 50                      | 16.17             | 12.64                  | 10                       |
| by compound             | fluspirilene | 1841-19-6  | cisplatin  | 24                      | 1                       | 50                      | 10.18             | 11.66                  | 10                       |
| by compound             | loperamide   | 34552-83-5 | neomycin   | 1                       | 0                       | 0                       | 95.05             | 9.71                   | 10                       |
| by compound             | loperamide   | 34552-83-5 | neomycin   | 1                       | 0.5                     | 0                       | 94.51             | 6.75                   | 10                       |
| by compound             | loperamide   | 34552-83-5 | neomycin   | 1                       | 1                       | 0                       | 99.45             | 8.76                   | 10                       |
| by compound             | loperamide   | 34552-83-5 | neomycin   | 1                       | 5                       | 0                       | 95.05             | 9.36                   | 10                       |
| by compound             | loperamide   | 34552-83-5 | neomycin   | 1                       | 10                      | 0                       | 73.63             | 17.22                  | 10                       |
| by compound             | loperamide   | 34552-83-5 | neomycin   | 1                       | 50                      | 0                       | 83.52             | 8.51                   | 10                       |
| by compound             | loperamide   | 34552-83-5 | neomycin   | 1                       | 100                     | 0                       | 87.36             | 10.82                  | 10                       |
| by compound             | loperamide   | 34552-83-5 | neomycin   | 1                       | 0                       | 200                     | 10.44             | 7.53                   | 10                       |
| by compound             | loperamide   | 34552-83-5 | neomycin   | 1                       | 0.5                     | 200                     | 21.43             | 7.53                   | 10                       |
| by compound             | loperamide   | 34552-83-5 | neomycin   | 1                       | 1                       | 200                     | 37.85             | 4.30                   | 9                        |
| by compound             | loperamide   | 34552-83-5 | neomycin   | 1                       | 5                       | 200                     | 76.92             | 7.77                   | 10                       |
| by compound             | loperamide   | 34552-83-5 | neomycin   | 1                       | 10                      | 200                     | 63.74             | 13.75                  | 10                       |
| by compound             | loperamide   | 34552-83-5 | neomycin   | 1                       | 50                      | 200                     | 66.54             | 16.81                  | 9                        |
| by compound             | loperamide   | 34552-83-5 | neomycin   | 1                       | 100                     | 200                     | 66.48             | 11.42                  | 10                       |
| by toxin                | loperamide   | 34552-83-5 | neomycin   | 1                       | 0                       | 0                       | 113.04            | 7.13                   | 10                       |
| by toxin                | loperamide   | 34552-83-5 | neomycin   | 1                       | 0                       | 25                      | 93.19             | 7.02                   | 12                       |
| by toxin                | loperamide   | 34552-83-5 | neomycin   | 1                       | 0                       | 50                      | 79.51             | 15.86                  | 12                       |
| by toxin                | loperamide   | 34552-83-5 | neomycin   | 1                       | 0                       | 100                     | 38.12             | 8.63                   | 11                       |
| by toxin                | loperamide   | 34552-83-5 | neomycin   | 1                       | 0                       | 200                     | 17.02             | 13.68                  | 10                       |
| by toxin                | loperamide   | 34552-83-5 | neomycin   | 1                       | 0                       | 400                     | 10.50             | 9.45                   | 11                       |
| by toxin                | loperamide   | 34552-83-5 | neomycin   | 1                       | 10                      | 0                       | 109.39            | 7.19                   | 11                       |
| by toxin                | loperamide   | 34552-83-5 | neomycin   | 1                       | 10                      | 25                      | 100.28            | 10.03                  | 10                       |
| by toxin                | loperamide   | 34552-83-5 | neomycin   | 1                       | 10                      | 50                      | 114.36            | 6.56                   | 11                       |
| by toxin                | loperamide   | 34552-83-5 | neomycin   | 1                       | 10                      | 100                     | 103.92            | 7.82                   | 10                       |
| by toxin                | loperamide   | 34552-83-5 | neomycin   | 1                       | 10                      | 200                     | 105.75            | 6.53                   | 10                       |
| by toxin                | loperamide   | 34552-83-5 | neomycin   | 1                       | 10                      | 400                     | 103.92            | 7.28                   | 10                       |
| by compound             | loperamide   | 34552-83-5 | gentamicin | 6                       | 0                       | 0                       | 100.00            | 7.66                   | 10                       |
| by compound             | loperamide   | 34552-83-5 | gentamicin | 6                       | 0.5                     | 0                       | 99.44             | 7.81                   | 10                       |
| by compound             | loperamide   | 34552-83-5 | gentamicin | 6                       | 1                       | 0                       | 96.09             | 9.42                   | 10                       |
| by compound             | loperamide   | 34552-83-5 | gentamicin | 6                       | 5                       | 0                       | 93.30             | 13.18                  | 10                       |
| by compound             | loperamide   | 34552-83-5 | gentamicin | 6                       | 10                      | 0                       | 95.53             | 26.26                  | 10                       |
| by compound             | loperamide   | 34552-83-5 | gentamicin | 6                       | 50                      | 0                       | 98.88             | 6.48                   | 10                       |
| by compound             | loperamide   | 34552-83-5 | gentamicin | 6                       | 100                     | 0                       | 99.44             | 8.65                   | 10                       |

| Experiment <sup>a</sup> | Compound     | Compound<br>CAS # | Toxin      | Toxin                               | Compound                                 | Toxin                                    | Standard          |                        |                          |
|-------------------------|--------------|-------------------|------------|-------------------------------------|------------------------------------------|------------------------------------------|-------------------|------------------------|--------------------------|
|                         |              |                   |            | exposure<br>time (hrs) <sup>b</sup> | concentration<br>( $\mu$ M) <sup>c</sup> | concentration<br>( $\mu$ M) <sup>d</sup> | Mean <sup>e</sup> | Deviation <sup>f</sup> | Sample size <sup>g</sup> |
| by compound             | loperamide   | 34552-83-5        | gentamicin | 6                                   | 0                                        | 50                                       | 24.58             | 13.99                  | 10                       |
| by compound             | loperamide   | 34552-83-5        | gentamicin | 6                                   | 0.5                                      | 50                                       | 32.96             | 10.68                  | 10                       |
| by compound             | loperamide   | 34552-83-5        | gentamicin | 6                                   | 1                                        | 50                                       | 40.78             | 5.30                   | 10                       |
| by compound             | loperamide   | 34552-83-5        | gentamicin | 6                                   | 5                                        | 50                                       | 59.22             | 14.23                  | 10                       |
| by compound             | loperamide   | 34552-83-5        | gentamicin | 6                                   | 10                                       | 50                                       | 84.92             | 11.72                  | 10                       |
| by compound             | loperamide   | 34552-83-5        | gentamicin | 6                                   | 25                                       | 50                                       | 89.39             | 10.20                  | 10                       |
| by compound             | loperamide   | 34552-83-5        | gentamicin | 6                                   | 100                                      | 50                                       | 70.76             | 12.45                  | 10                       |
| by toxin                | loperamide   | 34552-83-5        | gentamicin | 6                                   | 0                                        | 0                                        | 100.00            | 4.43                   | 10                       |
| by toxin                | loperamide   | 34552-83-5        | gentamicin | 6                                   | 0                                        | 25                                       | 52.25             | 13.52                  | 10                       |
| by toxin                | loperamide   | 34552-83-5        | gentamicin | 6                                   | 0                                        | 50                                       | 41.01             | 15.68                  | 10                       |
| by toxin                | loperamide   | 34552-83-5        | gentamicin | 6                                   | 0                                        | 100                                      | 10.11             | 8.70                   | 10                       |
| by toxin                | loperamide   | 34552-83-5        | gentamicin | 6                                   | 0                                        | 200                                      | 0.56              | 1.78                   | 10                       |
| by toxin                | loperamide   | 34552-83-5        | gentamicin | 6                                   | 0                                        | 400                                      | 0.56              | 1.78                   | 10                       |
| by toxin                | loperamide   | 34552-83-5        | gentamicin | 6                                   | 10                                       | 0                                        | 104.49            | 7.58                   | 10                       |
| by toxin                | loperamide   | 34552-83-5        | gentamicin | 6                                   | 10                                       | 25                                       | 103.93            | 8.88                   | 10                       |
| by toxin                | loperamide   | 34552-83-5        | gentamicin | 6                                   | 10                                       | 50                                       | 101.12            | 8.37                   | 10                       |
| by toxin                | loperamide   | 34552-83-5        | gentamicin | 6                                   | 10                                       | 100                                      | 96.53             | 10.61                  | 11                       |
| by toxin                | loperamide   | 34552-83-5        | gentamicin | 6                                   | 10                                       | 200                                      | 78.65             | 15.89                  | 10                       |
| by toxin                | loperamide   | 34552-83-5        | gentamicin | 6                                   | 10                                       | 400                                      | 82.02             | 7.58                   | 10                       |
| by compound             | loperamide   | 34552-83-5        | kanamycin  | 24                                  | 0                                        | 0                                        | 99.99             | 7.51                   | 10                       |
| by compound             | loperamide   | 34552-83-5        | kanamycin  | 24                                  | 0.5                                      | 0                                        | 117.68            | 6.27                   | 10                       |
| by compound             | loperamide   | 34552-83-5        | kanamycin  | 24                                  | 1                                        | 0                                        | 110.76            | 7.48                   | 10                       |
| by compound             | loperamide   | 34552-83-5        | kanamycin  | 24                                  | 5                                        | 0                                        | 113.28            | 8.82                   | 10                       |
| by compound             | loperamide   | 34552-83-5        | kanamycin  | 24                                  | 10                                       | 0                                        | 112.71            | 8.14                   | 11                       |
| by compound             | loperamide   | 34552-83-5        | kanamycin  | 24                                  | 25                                       | 0                                        | 112.65            | 6.51                   | 10                       |
| by compound             | loperamide   | 34552-83-5        | kanamycin  | 24                                  | 50                                       | 0                                        | 112.49            | 4.94                   | 8                        |
| by compound             | loperamide   | 34552-83-5        | kanamycin  | 24                                  | 0                                        | 400                                      | 52.86             | 7.99                   | 10                       |
| by compound             | loperamide   | 34552-83-5        | kanamycin  | 24                                  | 0.5                                      | 400                                      | 58.04             | 4.93                   | 9                        |
| by compound             | loperamide   | 34552-83-5        | kanamycin  | 24                                  | 1                                        | 400                                      | 52.86             | 10.13                  | 10                       |
| by compound             | loperamide   | 34552-83-5        | kanamycin  | 24                                  | 5                                        | 400                                      | 78.67             | 11.59                  | 10                       |
| by compound             | loperamide   | 34552-83-5        | kanamycin  | 24                                  | 10                                       | 400                                      | 100.06            | 5.18                   | 10                       |
| by compound             | loperamide   | 34552-83-5        | kanamycin  | 24                                  | 25                                       | 400                                      | 104.89            | 9.81                   | 9                        |
| by compound             | loperamide   | 34552-83-5        | kanamycin  | 24                                  | 50                                       | 400                                      | 103.39            | 8.27                   | 7                        |
| by compound             | loperamide   | 34552-83-5        | cisplatin  | 24                                  | 0                                        | 0                                        | 100.00            | 5.88                   | 10                       |
| by compound             | loperamide   | 34552-83-5        | cisplatin  | 24                                  | 0.5                                      | 0                                        | 101.18            | 12.61                  | 10                       |
| by compound             | loperamide   | 34552-83-5        | cisplatin  | 24                                  | 1                                        | 0                                        | 107.58            | 8.29                   | 11                       |
| by compound             | loperamide   | 34552-83-5        | cisplatin  | 24                                  | 5                                        | 0                                        | 110.06            | 8.91                   | 10                       |
| by compound             | loperamide   | 34552-83-5        | cisplatin  | 24                                  | 10                                       | 0                                        | 103.55            | 10.15                  | 10                       |
| by compound             | loperamide   | 34552-83-5        | cisplatin  | 24                                  | 50                                       | 0                                        | 105.33            | 8.73                   | 10                       |
| by compound             | loperamide   | 34552-83-5        | cisplatin  | 24                                  | 100                                      | 0                                        | 95.99             | 10.15                  | 9                        |
| by compound             | loperamide   | 34552-83-5        | cisplatin  | 24                                  | 0                                        | 50                                       | 17.75             | 10.44                  | 10                       |
| by compound             | loperamide   | 34552-83-5        | cisplatin  | 24                                  | 0.5                                      | 50                                       | 15.38             | 6.95                   | 10                       |
| by compound             | loperamide   | 34552-83-5        | cisplatin  | 24                                  | 1                                        | 50                                       | 18.29             | 11.97                  | 11                       |
| by compound             | loperamide   | 34552-83-5        | cisplatin  | 24                                  | 5                                        | 50                                       | 54.44             | 13.61                  | 10                       |
| by compound             | loperamide   | 34552-83-5        | cisplatin  | 24                                  | 10                                       | 50                                       | 53.85             | 9.02                   | 10                       |
| by compound             | loperamide   | 34552-83-5        | cisplatin  | 24                                  | 50                                       | 50                                       | 30.12             | 16.83                  | 11                       |
| by compound             | loperamide   | 34552-83-5        | cisplatin  | 24                                  | 100                                      | 50                                       | 1.48              | 3.68                   | 12                       |
| by toxin                | loperamide   | 34552-83-5        | cisplatin  | 24                                  | 0                                        | 0                                        | 100.00            | 7.00                   | 10                       |
| by toxin                | loperamide   | 34552-83-5        | cisplatin  | 24                                  | 0                                        | 5                                        | 76.67             | 11.11                  | 9                        |
| by toxin                | loperamide   | 34552-83-5        | cisplatin  | 24                                  | 0                                        | 10                                       | 65.63             | 9.60                   | 9                        |
| by toxin                | loperamide   | 34552-83-5        | cisplatin  | 24                                  | 0                                        | 25                                       | 30.41             | 12.87                  | 10                       |
| by toxin                | loperamide   | 34552-83-5        | cisplatin  | 24                                  | 0                                        | 50                                       | 17.54             | 10.13                  | 9                        |
| by toxin                | loperamide   | 34552-83-5        | cisplatin  | 24                                  | 0                                        | 100                                      | 1.75              | 3.95                   | 10                       |
| by toxin                | loperamide   | 34552-83-5        | cisplatin  | 24                                  | 10                                       | 0                                        | 105.26            | 8.72                   | 10                       |
| by toxin                | loperamide   | 34552-83-5        | cisplatin  | 24                                  | 10                                       | 5                                        | 105.26            | 10.31                  | 10                       |
| by toxin                | loperamide   | 34552-83-5        | cisplatin  | 24                                  | 10                                       | 10                                       | 102.92            | 8.36                   | 10                       |
| by toxin                | loperamide   | 34552-83-5        | cisplatin  | 24                                  | 10                                       | 25                                       | 51.57             | 14.28                  | 11                       |
| by toxin                | loperamide   | 34552-83-5        | cisplatin  | 24                                  | 10                                       | 50                                       | 32.96             | 9.53                   | 11                       |
| by toxin                | loperamide   | 34552-83-5        | cisplatin  | 24                                  | 10                                       | 100                                      | 2.34              | 5.65                   | 10                       |
| by compound             | methiothepin | 74611-28-2        | neomycin   | 1                                   | 0                                        | 0                                        | 100.00            | 11.25                  | 10                       |
| by compound             | methiothepin | 74611-28-2        | neomycin   | 1                                   | 5                                        | 0                                        | 102.62            | 7.43                   | 9                        |
| by compound             | methiothepin | 74611-28-2        | neomycin   | 1                                   | 10                                       | 0                                        | 95.54             | 14.40                  | 10                       |
| by compound             | methiothepin | 74611-28-2        | neomycin   | 1                                   | 15                                       | 0                                        | 85.63             | 14.63                  | 9                        |
| by compound             | methiothepin | 74611-28-2        | neomycin   | 1                                   | 0                                        | 200                                      | 2.83              | 3.36                   | 9                        |
| by compound             | methiothepin | 74611-28-2        | neomycin   | 1                                   | 5                                        | 200                                      | 62.90             | 14.22                  | 8                        |
| by compound             | methiothepin | 74611-28-2        | neomycin   | 1                                   | 10                                       | 200                                      | 89.17             | 11.92                  | 9                        |
| by compound             | methiothepin | 74611-28-2        | neomycin   | 1                                   | 15                                       | 200                                      | 72.89             | 9.07                   | 9                        |

| Experiment <sup>a</sup> | Compound     | Compound<br>CAS # | Toxin      | Toxin                               | Compound                                 | Toxin                                    | Standard          |                        |                          |
|-------------------------|--------------|-------------------|------------|-------------------------------------|------------------------------------------|------------------------------------------|-------------------|------------------------|--------------------------|
|                         |              |                   |            | exposure<br>time (hrs) <sup>b</sup> | concentration<br>( $\mu$ M) <sup>c</sup> | concentration<br>( $\mu$ M) <sup>d</sup> | Mean <sup>e</sup> | Deviation <sup>f</sup> | Sample size <sup>g</sup> |
| by toxin                | methiothepin | 74611-28-2        | neomycin   | 1                                   | 0                                        | 0                                        | 100.00            | 7.56                   | 10                       |
| by toxin                | methiothepin | 74611-28-2        | neomycin   | 1                                   | 0                                        | 25                                       | 86.44             | 7.07                   | 10                       |
| by toxin                | methiothepin | 74611-28-2        | neomycin   | 1                                   | 0                                        | 50                                       | 44.07             | 9.53                   | 10                       |
| by toxin                | methiothepin | 74611-28-2        | neomycin   | 1                                   | 0                                        | 100                                      | 20.90             | 10.67                  | 10                       |
| by toxin                | methiothepin | 74611-28-2        | neomycin   | 1                                   | 0                                        | 200                                      | 1.69              | 3.81                   | 10                       |
| by toxin                | methiothepin | 74611-28-2        | neomycin   | 1                                   | 0                                        | 400                                      | 1.54              | 3.65                   | 11                       |
| by toxin                | methiothepin | 74611-28-2        | neomycin   | 1                                   | 10                                       | 0                                        | 100.00            | 8.01                   | 10                       |
| by toxin                | methiothepin | 74611-28-2        | neomycin   | 1                                   | 10                                       | 25                                       | 97.18             | 8.75                   | 10                       |
| by toxin                | methiothepin | 74611-28-2        | neomycin   | 1                                   | 10                                       | 50                                       | 99.44             | 8.08                   | 10                       |
| by toxin                | methiothepin | 74611-28-2        | neomycin   | 1                                   | 10                                       | 100                                      | 97.18             | 10.25                  | 10                       |
| by toxin                | methiothepin | 74611-28-2        | neomycin   | 1                                   | 10                                       | 200                                      | 88.70             | 11.93                  | 10                       |
| by toxin                | methiothepin | 74611-28-2        | neomycin   | 1                                   | 10                                       | 400                                      | 67.80             | 15.76                  | 10                       |
| by compound             | methiothepin | 74611-28-2        | gentamicin | 6                                   | 0                                        | 0                                        | 100.00            | 8.04                   | 9                        |
| by compound             | methiothepin | 74611-28-2        | gentamicin | 6                                   | 0.5                                      | 0                                        | 97.64             | 4.49                   | 10                       |
| by compound             | methiothepin | 74611-28-2        | gentamicin | 6                                   | 1                                        | 0                                        | 97.58             | 8.29                   | 9                        |
| by compound             | methiothepin | 74611-28-2        | gentamicin | 6                                   | 5                                        | 0                                        | 99.27             | 6.28                   | 10                       |
| by compound             | methiothepin | 74611-28-2        | gentamicin | 6                                   | 0                                        | 50                                       | 38.18             | 8.04                   | 9                        |
| by compound             | methiothepin | 74611-28-2        | gentamicin | 6                                   | 0.5                                      | 50                                       | 42.00             | 9.08                   | 10                       |
| by compound             | methiothepin | 74611-28-2        | gentamicin | 6                                   | 1                                        | 50                                       | 61.64             | 10.35                  | 10                       |
| by compound             | methiothepin | 74611-28-2        | gentamicin | 6                                   | 5                                        | 50                                       | 56.18             | 11.83                  | 10                       |
| by toxin                | methiothepin | 74611-28-2        | gentamicin | 6                                   | 0                                        | 0                                        | 100               | 6.4870817              | 10                       |
| by toxin                | methiothepin | 74611-28-2        | gentamicin | 6                                   | 0                                        | 25                                       | 62.22222          | 12.64565               | 10                       |
| by toxin                | methiothepin | 74611-28-2        | gentamicin | 6                                   | 0                                        | 50                                       | 26.26             | 11.81                  | 11                       |
| by toxin                | methiothepin | 74611-28-2        | gentamicin | 6                                   | 0                                        | 100                                      | 8.89              | 9.25                   | 10                       |
| by toxin                | methiothepin | 74611-28-2        | gentamicin | 6                                   | 0                                        | 200                                      | 1.11              | 3.55                   | 10                       |
| by toxin                | methiothepin | 74611-28-2        | gentamicin | 6                                   | 0                                        | 400                                      | 0.00              | 0.00                   | 10                       |
| by toxin                | methiothepin | 74611-28-2        | gentamicin | 6                                   | 3                                        | 0                                        | 102.78            | 6.62                   | 10                       |
| by toxin                | methiothepin | 74611-28-2        | gentamicin | 6                                   | 3                                        | 25                                       | 76.67             | 15.85                  | 10                       |
| by toxin                | methiothepin | 74611-28-2        | gentamicin | 6                                   | 3                                        | 50                                       | 70.00             | 13.29                  | 10                       |
| by toxin                | methiothepin | 74611-28-2        | gentamicin | 6                                   | 3                                        | 100                                      | 43.33             | 9.10                   | 10                       |
| by toxin                | methiothepin | 74611-28-2        | gentamicin | 6                                   | 3                                        | 200                                      | 41.67             | 7.61                   | 10                       |
| by toxin                | methiothepin | 74611-28-2        | gentamicin | 6                                   | 3                                        | 400                                      | 24.44             | 11.30                  | 10                       |
| by compound             | methiothepin | 74611-28-2        | kanamycin  | 24                                  | 0                                        | 0                                        | 100.00            | 6.91                   | 11                       |
| by compound             | methiothepin | 74611-28-2        | kanamycin  | 24                                  | 0.1                                      | 0                                        | 102.37            | 8.33                   | 12                       |
| by compound             | methiothepin | 74611-28-2        | kanamycin  | 24                                  | 0.5                                      | 0                                        | 99.39             | 8.50                   | 10                       |
| by compound             | methiothepin | 74611-28-2        | kanamycin  | 24                                  | 1                                        | 0                                        | 98.65             | 5.40                   | 12                       |
| by compound             | methiothepin | 74611-28-2        | kanamycin  | 24                                  | 5                                        | 0                                        | 65.89             | 10.87                  | 5                        |
| by compound             | methiothepin | 74611-28-2        | kanamycin  | 24                                  | 0                                        | 50                                       | 45.18             | 10.69                  | 11                       |
| by compound             | methiothepin | 74611-28-2        | kanamycin  | 24                                  | 0.1                                      | 50                                       | 37.06             | 8.28                   | 11                       |
| by compound             | methiothepin | 74611-28-2        | kanamycin  | 24                                  | 0.5                                      | 50                                       | 44.67             | 7.69                   | 11                       |
| by compound             | methiothepin | 74611-28-2        | kanamycin  | 24                                  | 1                                        | 50                                       | 36.55             | 7.86                   | 11                       |
| by compound             | methiothepin | 74611-28-2        | cisplatin  | 24                                  | 0                                        | 0                                        | 100.00            | 5.04                   | 11                       |
| by compound             | methiothepin | 74611-28-2        | cisplatin  | 24                                  | 0.1                                      | 0                                        | 99.75             | 8.89                   | 10                       |
| by compound             | methiothepin | 74611-28-2        | cisplatin  | 24                                  | 0.5                                      | 0                                        | 85.68             | 6.29                   | 9                        |
| by compound             | methiothepin | 74611-28-2        | cisplatin  | 24                                  | 1                                        | 0                                        | 96.08             | 5.29                   | 11                       |
| by compound             | methiothepin | 74611-28-2        | cisplatin  | 24                                  | 0                                        | 50                                       | 1.08              | 2.27                   | 10                       |
| by compound             | methiothepin | 74611-28-2        | cisplatin  | 24                                  | 0.1                                      | 50                                       | 7.19              | 9.72                   | 9                        |
| by compound             | methiothepin | 74611-28-2        | cisplatin  | 24                                  | 0.5                                      | 50                                       | 1.80              | 3.81                   | 9                        |
| by compound             | methiothepin | 74611-28-2        | cisplatin  | 24                                  | 1                                        | 50                                       | 0.54              | 1.70                   | 10                       |
| by compound             | paroxetine   | 110429-35-1       | neomycin   | 1                                   | 0                                        | 0                                        | 100.00            | 11.18                  | 10                       |
| by compound             | paroxetine   | 110429-35-1       | neomycin   | 1                                   | 1                                        | 0                                        | 100.71            | 10.03                  | 9                        |
| by compound             | paroxetine   | 110429-35-1       | neomycin   | 1                                   | 5                                        | 0                                        | 103.96            | 9.14                   | 9                        |
| by compound             | paroxetine   | 110429-35-1       | neomycin   | 1                                   | 10                                       | 0                                        | 102.34            | 4.42                   | 8                        |
| by compound             | paroxetine   | 110429-35-1       | neomycin   | 1                                   | 50                                       | 0                                        | 68.88             | 19.12                  | 9                        |
| by compound             | paroxetine   | 110429-35-1       | neomycin   | 1                                   | 100                                      | 0                                        | 47.43             | 12.89                  | 9                        |
| by compound             | paroxetine   | 110429-35-1       | neomycin   | 1                                   | 0                                        | 200                                      | 8.77              | 7.42                   | 10                       |
| by compound             | paroxetine   | 110429-35-1       | neomycin   | 1                                   | 0.5                                      | 200                                      | 16.37             | 10.24                  | 10                       |
| by compound             | paroxetine   | 110429-35-1       | neomycin   | 1                                   | 1                                        | 200                                      | 17.54             | 12.06                  | 9                        |
| by compound             | paroxetine   | 110429-35-1       | neomycin   | 1                                   | 5                                        | 200                                      | 50.68             | 7.16                   | 9                        |
| by compound             | paroxetine   | 110429-35-1       | neomycin   | 1                                   | 10                                       | 200                                      | 93.57             | 9.25                   | 9                        |
| by compound             | paroxetine   | 110429-35-1       | neomycin   | 1                                   | 50                                       | 200                                      | 66.28             | 12.41                  | 9                        |
| by compound             | paroxetine   | 110429-35-1       | neomycin   | 1                                   | 100                                      | 200                                      | 59.65             | 10.96                  | 10                       |
| by toxin                | paroxetine   | 110429-35-1       | neomycin   | 1                                   | 0                                        | 0                                        | 100.00            | 7.68                   | 10                       |
| by toxin                | paroxetine   | 110429-35-1       | neomycin   | 1                                   | 0                                        | 25                                       | 76.37             | 10.51                  | 10                       |
| by toxin                | paroxetine   | 110429-35-1       | neomycin   | 1                                   | 0                                        | 50                                       | 57.14             | 6.45                   | 10                       |
| by toxin                | paroxetine   | 110429-35-1       | neomycin   | 1                                   | 0                                        | 100                                      | 35.16             | 8.67                   | 10                       |
| by toxin                | paroxetine   | 110429-35-1       | neomycin   | 1                                   | 0                                        | 200                                      | 11.54             | 8.37                   | 10                       |

| Experiment <sup>a</sup> | Compound         | Compound    |            | Toxin                   | Toxin exposure                 | Compound concentration         | Toxin concentration | Standard               |                          |
|-------------------------|------------------|-------------|------------|-------------------------|--------------------------------|--------------------------------|---------------------|------------------------|--------------------------|
|                         |                  | CAS #       | Toxin      | time (hrs) <sup>b</sup> | ( $\mu\text{M}$ ) <sup>c</sup> | ( $\mu\text{M}$ ) <sup>d</sup> | Mean <sup>e</sup>   | Deviation <sup>f</sup> | Sample size <sup>g</sup> |
| by toxin                | paroxetine       | 110429-35-1 | neomycin   | 1                       | 0                              | 400                            | 3.30                | 5.31                   | 10                       |
| by toxin                | paroxetine       | 110429-35-1 | neomycin   | 1                       | 10                             | 0                              | 94.02               | 7.50                   | 9                        |
| by toxin                | paroxetine       | 110429-35-1 | neomycin   | 1                       | 10                             | 25                             | 87.91               | 8.19                   | 10                       |
| by toxin                | paroxetine       | 110429-35-1 | neomycin   | 1                       | 10                             | 50                             | 80.22               | 11.05                  | 10                       |
| by toxin                | paroxetine       | 110429-35-1 | neomycin   | 1                       | 10                             | 100                            | 90.66               | 7.88                   | 10                       |
| by toxin                | paroxetine       | 110429-35-1 | neomycin   | 1                       | 10                             | 200                            | 92.31               | 5.05                   | 10                       |
| by toxin                | paroxetine       | 110429-35-1 | neomycin   | 1                       | 10                             | 400                            | 62.09               | 8.21                   | 10                       |
| by compound             | paroxetine       | 110429-35-1 | gentamicin | 6                       | 0                              | 0                              | 100.00              | 12.20                  | 10                       |
| by compound             | paroxetine       | 110429-35-1 | gentamicin | 6                       | 1                              | 0                              | 102.12              | 8.17                   | 9                        |
| by compound             | paroxetine       | 110429-35-1 | gentamicin | 6                       | 5                              | 0                              | 97.11               | 7.61                   | 10                       |
| by compound             | paroxetine       | 110429-35-1 | gentamicin | 6                       | 10                             | 0                              | 104.62              | 6.92                   | 10                       |
| by compound             | paroxetine       | 110429-35-1 | gentamicin | 6                       | 50                             | 0                              | 44.96               | 11.11                  | 9                        |
| by compound             | paroxetine       | 110429-35-1 | gentamicin | 6                       | 0                              | 50                             | 24.28               | 19.99                  | 10                       |
| by compound             | paroxetine       | 110429-35-1 | gentamicin | 6                       | 0.5                            | 50                             | 42.39               | 7.65                   | 9                        |
| by compound             | paroxetine       | 110429-35-1 | gentamicin | 6                       | 1                              | 50                             | 40.46               | 9.82                   | 10                       |
| by compound             | paroxetine       | 110429-35-1 | gentamicin | 6                       | 5                              | 50                             | 57.80               | 10.90                  | 10                       |
| by compound             | paroxetine       | 110429-35-1 | gentamicin | 6                       | 10                             | 50                             | 90.17               | 8.70                   | 10                       |
| by compound             | paroxetine       | 110429-35-1 | gentamicin | 6                       | 50                             | 50                             | 37.25               | 13.28                  | 9                        |
| by toxin                | paroxetine       | 110429-35-1 | gentamicin | 6                       | 0                              | 0                              | 100.00              | 6.08                   | 7                        |
| by toxin                | paroxetine       | 110429-35-1 | gentamicin | 6                       | 0                              | 25                             | 46.09               | 7.64                   | 7                        |
| by toxin                | paroxetine       | 110429-35-1 | gentamicin | 6                       | 0                              | 50                             | 28.71               | 5.66                   | 8                        |
| by toxin                | paroxetine       | 110429-35-1 | gentamicin | 6                       | 0                              | 100                            | 2.05                | 4.07                   | 8                        |
| by toxin                | paroxetine       | 110429-35-1 | gentamicin | 6                       | 0                              | 200                            | 1.37                | 3.87                   | 8                        |
| by toxin                | paroxetine       | 110429-35-1 | gentamicin | 6                       | 0                              | 400                            | 0.68                | 1.93                   | 8                        |
| by toxin                | paroxetine       | 110429-35-1 | gentamicin | 6                       | 10                             | 0                              | 98.44               | 9.98                   | 7                        |
| by toxin                | paroxetine       | 110429-35-1 | gentamicin | 6                       | 10                             | 25                             | 95.70               | 5.06                   | 8                        |
| by toxin                | paroxetine       | 110429-35-1 | gentamicin | 6                       | 10                             | 50                             | 87.50               | 6.53                   | 8                        |
| by toxin                | paroxetine       | 110429-35-1 | gentamicin | 6                       | 10                             | 100                            | 60.16               | 16.53                  | 8                        |
| by toxin                | paroxetine       | 110429-35-1 | gentamicin | 6                       | 10                             | 200                            | 53.32               | 7.01                   | 8                        |
| by toxin                | paroxetine       | 110429-35-1 | gentamicin | 6                       | 10                             | 400                            | 42.38               | 4.85                   | 8                        |
| by compound             | paroxetine       | 110429-35-1 | kanamycin  | 24                      | 0                              | 0                              | 100.00              | 7.27                   | 10                       |
| by compound             | paroxetine       | 110429-35-1 | kanamycin  | 24                      | 0.5                            | 0                              | 98.85               | 5.94                   | 10                       |
| by compound             | paroxetine       | 110429-35-1 | kanamycin  | 24                      | 1                              | 0                              | 97.70               | 6.64                   | 10                       |
| by compound             | paroxetine       | 110429-35-1 | kanamycin  | 24                      | 5                              | 0                              | 103.45              | 6.64                   | 10                       |
| by compound             | paroxetine       | 110429-35-1 | kanamycin  | 24                      | 10                             | 0                              | 89.66               | 9.07                   | 10                       |
| by compound             | paroxetine       | 110429-35-1 | kanamycin  | 24                      | 0                              | 400                            | 37.36               | 13.06                  | 10                       |
| by compound             | paroxetine       | 110429-35-1 | kanamycin  | 24                      | 0.5                            | 400                            | 44.93               | 12.01                  | 11                       |
| by compound             | paroxetine       | 110429-35-1 | kanamycin  | 24                      | 1                              | 400                            | 35.63               | 9.31                   | 10                       |
| by compound             | paroxetine       | 110429-35-1 | kanamycin  | 24                      | 5                              | 400                            | 51.15               | 11.64                  | 10                       |
| by compound             | paroxetine       | 110429-35-1 | kanamycin  | 24                      | 10                             | 400                            | 47.13               | 14.28                  | 10                       |
| by compound             | paroxetine       | 110429-35-1 | cisplatin  | 24                      | 0                              | 0                              | 102.40              | 8.05                   | 11                       |
| by compound             | paroxetine       | 110429-35-1 | cisplatin  | 24                      | 0.5                            | 0                              | 102.87              | 8.76                   | 10                       |
| by compound             | paroxetine       | 110429-35-1 | cisplatin  | 24                      | 1                              | 0                              | 96.55               | 5.28                   | 10                       |
| by compound             | paroxetine       | 110429-35-1 | cisplatin  | 24                      | 5                              | 0                              | 93.10               | 12.65                  | 10                       |
| by compound             | paroxetine       | 110429-35-1 | cisplatin  | 24                      | 10                             | 0                              | 62.70               | 16.35                  | 11                       |
| by compound             | paroxetine       | 110429-35-1 | cisplatin  | 24                      | 0                              | 50                             | 7.84                | 6.44                   | 11                       |
| by compound             | paroxetine       | 110429-35-1 | cisplatin  | 24                      | 0.5                            | 50                             | 10.54               | 9.11                   | 12                       |
| by compound             | paroxetine       | 110429-35-1 | cisplatin  | 24                      | 1                              | 50                             | 17.24               | 8.57                   | 10                       |
| by compound             | paroxetine       | 110429-35-1 | cisplatin  | 24                      | 5                              | 50                             | 38.51               | 5.45                   | 10                       |
| by compound             | paroxetine       | 110429-35-1 | cisplatin  | 24                      | 10                             | 50                             | 25.08               | 11.57                  | 11                       |
| by toxin                | paroxetine       | 110429-35-1 | cisplatin  | 24                      | 0                              | 0                              | 100.00              | 5.27                   | 11                       |
| by toxin                | paroxetine       | 110429-35-1 | cisplatin  | 24                      | 0                              | 5                              | 94.92               | 5.32                   | 12                       |
| by toxin                | paroxetine       | 110429-35-1 | cisplatin  | 24                      | 0                              | 10                             | 88.22               | 7.81                   | 10                       |
| by toxin                | paroxetine       | 110429-35-1 | cisplatin  | 24                      | 0                              | 25                             | 44.20               | 7.32                   | 12                       |
| by toxin                | paroxetine       | 110429-35-1 | cisplatin  | 24                      | 0                              | 50                             | 16.75               | 9.67                   | 9                        |
| by toxin                | paroxetine       | 110429-35-1 | cisplatin  | 24                      | 0                              | 100                            | 1.68                | 3.77                   | 10                       |
| by toxin                | paroxetine       | 110429-35-1 | cisplatin  | 24                      | 5                              | 0                              | 99.49               | 6.98                   | 11                       |
| by toxin                | paroxetine       | 110429-35-1 | cisplatin  | 24                      | 5                              | 5                              | 99.49               | 7.42                   | 11                       |
| by toxin                | paroxetine       | 110429-35-1 | cisplatin  | 24                      | 5                              | 10                             | 87.31               | 7.60                   | 11                       |
| by toxin                | paroxetine       | 110429-35-1 | cisplatin  | 24                      | 5                              | 25                             | 51.93               | 9.51                   | 10                       |
| by toxin                | paroxetine       | 110429-35-1 | cisplatin  | 24                      | 5                              | 50                             | 39.64               | 11.00                  | 10                       |
| by toxin                | paroxetine       | 110429-35-1 | cisplatin  | 24                      | 5                              | 100                            | 13.20               | 8.38                   | 11                       |
| by toxin                | phenoxybenzamine | 63-92-3     | neomycin   | 1                       | 0                              | 0                              | 100.00              | 7.74                   | 10                       |
| by toxin                | phenoxybenzamine | 63-92-3     | neomycin   | 1                       | 0                              | 25                             | 86.29               | 8.71                   | 10                       |
| by toxin                | phenoxybenzamine | 63-92-3     | neomycin   | 1                       | 0                              | 50                             | 39.43               | 7.35                   | 10                       |
| by toxin                | phenoxybenzamine | 63-92-3     | neomycin   | 1                       | 0                              | 100                            | 21.71               | 7.52                   | 10                       |
| by toxin                | phenoxybenzamine | 63-92-3     | neomycin   | 1                       | 0                              | 200                            | 2.86                | 4.86                   | 10                       |

| Experiment <sup>a</sup> | Compound         | Compound<br>CAS # | Toxin      | Toxin                               | Compound                                 | Toxin                                    | Standard          |                        |                          |
|-------------------------|------------------|-------------------|------------|-------------------------------------|------------------------------------------|------------------------------------------|-------------------|------------------------|--------------------------|
|                         |                  |                   |            | exposure<br>time (hrs) <sup>b</sup> | concentration<br>( $\mu$ M) <sup>c</sup> | concentration<br>( $\mu$ M) <sup>d</sup> | Mean <sup>e</sup> | Deviation <sup>f</sup> | Sample size <sup>g</sup> |
| by toxin                | phenoxybenzamine | 63-92-3           | neomycin   | 1                                   | 0                                        | 400                                      | 5.19              | 5.39                   | 11                       |
| by toxin                | phenoxybenzamine | 63-92-3           | neomycin   | 1                                   | 50                                       | 0                                        | 72.38             | 16.16                  | 9                        |
| by toxin                | phenoxybenzamine | 63-92-3           | neomycin   | 1                                   | 50                                       | 25                                       | 62.29             | 12.48                  | 10                       |
| by toxin                | phenoxybenzamine | 63-92-3           | neomycin   | 1                                   | 50                                       | 50                                       | 56.00             | 6.49                   | 10                       |
| by toxin                | phenoxybenzamine | 63-92-3           | neomycin   | 1                                   | 50                                       | 100                                      | 58.29             | 7.52                   | 10                       |
| by toxin                | phenoxybenzamine | 63-92-3           | neomycin   | 1                                   | 50                                       | 200                                      | 57.14             | 7.62                   | 10                       |
| by toxin                | phenoxybenzamine | 63-92-3           | neomycin   | 1                                   | 50                                       | 400                                      | 61.90             | 15.57                  | 12                       |
| by compound             | phenoxybenzamine | 63-92-3           | gentamicin | 6                                   | 0                                        | 0                                        | 100.00            | 9.20                   | 10                       |
| by compound             | phenoxybenzamine | 63-92-3           | gentamicin | 6                                   | 0.5                                      | 0                                        | 106.54            | 6.20                   | 9                        |
| by compound             | phenoxybenzamine | 63-92-3           | gentamicin | 6                                   | 1                                        | 0                                        | 104.71            | 6.08                   | 10                       |
| by compound             | phenoxybenzamine | 63-92-3           | gentamicin | 6                                   | 5                                        | 0                                        | 97.65             | 4.96                   | 10                       |
| by compound             | phenoxybenzamine | 63-92-3           | gentamicin | 6                                   | 10                                       | 0                                        | 83.53             | 11.02                  | 10                       |
| by compound             | phenoxybenzamine | 63-92-3           | gentamicin | 6                                   | 50                                       | 0                                        | 38.56             | 21.43                  | 9                        |
| by compound             | phenoxybenzamine | 63-92-3           | gentamicin | 6                                   | 100                                      | 0                                        | 44.12             | 10.83                  | 10                       |
| by compound             | phenoxybenzamine | 63-92-3           | gentamicin | 6                                   | 0                                        | 200                                      | 0.00              | 0.00                   | 10                       |
| by compound             | phenoxybenzamine | 63-92-3           | gentamicin | 6                                   | 0.5                                      | 200                                      | 4.71              | 9.53                   | 10                       |
| by compound             | phenoxybenzamine | 63-92-3           | gentamicin | 6                                   | 1                                        | 200                                      | 3.53              | 9.28                   | 10                       |
| by compound             | phenoxybenzamine | 63-92-3           | gentamicin | 6                                   | 5                                        | 200                                      | 24.71             | 13.24                  | 10                       |
| by compound             | phenoxybenzamine | 63-92-3           | gentamicin | 6                                   | 10                                       | 200                                      | 37.06             | 6.82                   | 10                       |
| by compound             | phenoxybenzamine | 63-92-3           | gentamicin | 6                                   | 50                                       | 200                                      | 43.79             | 18.16                  | 9                        |
| by compound             | phenoxybenzamine | 63-92-3           | gentamicin | 6                                   | 100                                      | 200                                      | 17.65             | 8.82                   | 9                        |
| by toxin                | phenoxybenzamine | 63-92-3           | gentamicin | 6                                   | 0                                        | 0                                        | 100.00            | 4.43                   | 10                       |
| by toxin                | phenoxybenzamine | 63-92-3           | gentamicin | 6                                   | 0                                        | 25                                       | 52.25             | 13.52                  | 10                       |
| by toxin                | phenoxybenzamine | 63-92-3           | gentamicin | 6                                   | 0                                        | 50                                       | 41.01             | 15.68                  | 10                       |
| by toxin                | phenoxybenzamine | 63-92-3           | gentamicin | 6                                   | 0                                        | 100                                      | 10.11             | 8.70                   | 10                       |
| by toxin                | phenoxybenzamine | 63-92-3           | gentamicin | 6                                   | 0                                        | 200                                      | 0.56              | 1.78                   | 10                       |
| by toxin                | phenoxybenzamine | 63-92-3           | gentamicin | 6                                   | 0                                        | 400                                      | 0.56              | 1.78                   | 10                       |
| by toxin                | phenoxybenzamine | 63-92-3           | gentamicin | 6                                   | 50                                       | 0                                        | 83.15             | 12.65                  | 10                       |
| by toxin                | phenoxybenzamine | 63-92-3           | gentamicin | 6                                   | 50                                       | 25                                       | 76.40             | 12.76                  | 10                       |
| by toxin                | phenoxybenzamine | 63-92-3           | gentamicin | 6                                   | 50                                       | 50                                       | 54.07             | 9.93                   | 8                        |
| by toxin                | phenoxybenzamine | 63-92-3           | gentamicin | 6                                   | 50                                       | 100                                      | 57.30             | 10.53                  | 10                       |
| by toxin                | phenoxybenzamine | 63-92-3           | gentamicin | 6                                   | 50                                       | 200                                      | 70.54             | 8.00                   | 9                        |
| by toxin                | phenoxybenzamine | 63-92-3           | gentamicin | 6                                   | 50                                       | 400                                      | 52.81             | 12.19                  | 10                       |
| by compound             | phenoxybenzamine | 63-92-3           | kanamycin  | 24                                  | 0                                        | 0                                        | 100.00            | 5.40                   | 11                       |
| by compound             | phenoxybenzamine | 63-92-3           | kanamycin  | 24                                  | 0.5                                      | 0                                        | 96.32             | 8.81                   | 10                       |
| by compound             | phenoxybenzamine | 63-92-3           | kanamycin  | 24                                  | 1                                        | 0                                        | 100.88            | 7.73                   | 10                       |
| by compound             | phenoxybenzamine | 63-92-3           | kanamycin  | 24                                  | 5                                        | 0                                        | 100.52            | 4.68                   | 11                       |
| by compound             | phenoxybenzamine | 63-92-3           | kanamycin  | 24                                  | 10                                       | 0                                        | 100.00            | 7.91                   | 11                       |
| by compound             | phenoxybenzamine | 63-92-3           | kanamycin  | 24                                  | 50                                       | 0                                        | 101.17            | 7.03                   | 12                       |
| by compound             | phenoxybenzamine | 63-92-3           | kanamycin  | 24                                  | 0                                        | 400                                      | 43.89             | 7.24                   | 10                       |
| by compound             | phenoxybenzamine | 63-92-3           | kanamycin  | 24                                  | 0.5                                      | 400                                      | 50.26             | 10.28                  | 11                       |
| by compound             | phenoxybenzamine | 63-92-3           | kanamycin  | 24                                  | 1                                        | 400                                      | 46.74             | 7.61                   | 10                       |
| by compound             | phenoxybenzamine | 63-92-3           | kanamycin  | 24                                  | 5                                        | 400                                      | 30.57             | 10.10                  | 11                       |
| by compound             | phenoxybenzamine | 63-92-3           | kanamycin  | 24                                  | 10                                       | 400                                      | 32.77             | 11.59                  | 12                       |
| by compound             | phenoxybenzamine | 63-92-3           | kanamycin  | 24                                  | 50                                       | 400                                      | 22.80             | 11.82                  | 12                       |
| by compound             | phenoxybenzamine | 63-92-3           | cisplatin  | 24                                  | 0                                        | 0                                        | 100.00            | 8.95                   | 11                       |
| by compound             | phenoxybenzamine | 63-92-3           | cisplatin  | 24                                  | 0.5                                      | 0                                        | 107.78            | 8.47                   | 9                        |
| by compound             | phenoxybenzamine | 63-92-3           | cisplatin  | 24                                  | 1                                        | 0                                        | 102.40            | 8.21                   | 10                       |
| by compound             | phenoxybenzamine | 63-92-3           | cisplatin  | 24                                  | 5                                        | 0                                        | 102.46            | 7.60                   | 9                        |
| by compound             | phenoxybenzamine | 63-92-3           | cisplatin  | 24                                  | 0                                        | 50                                       | 1.20              | 2.52                   | 10                       |
| by compound             | phenoxybenzamine | 63-92-3           | cisplatin  | 24                                  | 0.5                                      | 50                                       | 24.55             | 13.67                  | 10                       |
| by compound             | phenoxybenzamine | 63-92-3           | cisplatin  | 24                                  | 1                                        | 50                                       | 32.12             | 15.68                  | 11                       |
| by compound             | phenoxybenzamine | 63-92-3           | cisplatin  | 24                                  | 5                                        | 50                                       | 2.25              | 4.46                   | 8                        |
| by toxin                | phenoxybenzamine | 63-92-3           | cisplatin  | 24                                  | 0                                        | 0                                        | 100.00            | 5.08                   | 10                       |
| by toxin                | phenoxybenzamine | 63-92-3           | cisplatin  | 24                                  | 0                                        | 5                                        | 102.41            | 5.74                   | 12                       |
| by toxin                | phenoxybenzamine | 63-92-3           | cisplatin  | 24                                  | 0                                        | 10                                       | 95.18             | 8.42                   | 10                       |
| by toxin                | phenoxybenzamine | 63-92-3           | cisplatin  | 24                                  | 0                                        | 25                                       | 47.69             | 7.90                   | 12                       |
| by toxin                | phenoxybenzamine | 63-92-3           | cisplatin  | 24                                  | 0                                        | 50                                       | 18.07             | 10.43                  | 9                        |
| by toxin                | phenoxybenzamine | 63-92-3           | cisplatin  | 24                                  | 0                                        | 100                                      | 1.81              | 4.07                   | 10                       |
| by toxin                | phenoxybenzamine | 63-92-3           | cisplatin  | 24                                  | 1                                        | 0                                        | 107.93            | 7.90                   | 12                       |
| by toxin                | phenoxybenzamine | 63-92-3           | cisplatin  | 24                                  | 1                                        | 5                                        | 101.74            | 7.03                   | 9                        |
| by toxin                | phenoxybenzamine | 63-92-3           | cisplatin  | 24                                  | 1                                        | 10                                       | 81.33             | 13.09                  | 10                       |
| by toxin                | phenoxybenzamine | 63-92-3           | cisplatin  | 24                                  | 1                                        | 25                                       | 41.67             | 13.21                  | 12                       |
| by toxin                | phenoxybenzamine | 63-92-3           | cisplatin  | 24                                  | 1                                        | 50                                       | 22.45             | 18.29                  | 11                       |
| by compound             | ractopamine      | 90274-24-1        | neomycin   | 1                                   | 0                                        | 0                                        | 100.00            | 7.73                   | 10                       |
| by compound             | ractopamine      | 90274-24-1        | neomycin   | 1                                   | 0.5                                      | 0                                        | 98.84             | 7.44                   | 10                       |
| by compound             | ractopamine      | 90274-24-1        | neomycin   | 1                                   | 1                                        | 0                                        | 95.95             | 6.78                   | 10                       |



| Experiment <sup>a</sup> | Compound    | Compound   |            | Toxin                   | Toxin exposure                 | Compound concentration         | Toxin concentration | Standard               |                          |  |
|-------------------------|-------------|------------|------------|-------------------------|--------------------------------|--------------------------------|---------------------|------------------------|--------------------------|--|
|                         |             | CAS #      | Toxin      | time (hrs) <sup>b</sup> | ( $\mu\text{M}$ ) <sup>c</sup> | ( $\mu\text{M}$ ) <sup>d</sup> | Mean <sup>e</sup>   | Deviation <sup>f</sup> | Sample size <sup>g</sup> |  |
| by compound             | ractopamine | 90274-24-1 | neomycin   | 1                       | 5                              | 0                              | 104.05              | 6.67                   | 10                       |  |
| by compound             | ractopamine | 90274-24-1 | neomycin   | 1                       | 10                             | 0                              | 96.53               | 6.70                   | 10                       |  |
| by compound             | ractopamine | 90274-24-1 | neomycin   | 1                       | 50                             | 0                              | 100.58              | 8.26                   | 10                       |  |
| by compound             | ractopamine | 90274-24-1 | neomycin   | 1                       | 100                            | 0                              | 100.00              | 7.24                   | 10                       |  |
| by compound             | ractopamine | 90274-24-1 | neomycin   | 1                       | 0                              | 200                            | 16.76               | 8.81                   | 10                       |  |
| by compound             | ractopamine | 90274-24-1 | neomycin   | 1                       | 0.5                            | 200                            | 19.65               | 7.31                   | 10                       |  |
| by compound             | ractopamine | 90274-24-1 | neomycin   | 1                       | 1                              | 200                            | 21.39               | 7.73                   | 10                       |  |
| by compound             | ractopamine | 90274-24-1 | neomycin   | 1                       | 5                              | 200                            | 32.37               | 16.62                  | 10                       |  |
| by compound             | ractopamine | 90274-24-1 | neomycin   | 1                       | 10                             | 200                            | 40.46               | 10.20                  | 10                       |  |
| by compound             | ractopamine | 90274-24-1 | neomycin   | 1                       | 50                             | 200                            | 100.58              | 8.70                   | 10                       |  |
| by compound             | ractopamine | 90274-24-1 | neomycin   | 1                       | 100                            | 200                            | 104.62              | 8.81                   | 10                       |  |
| by toxin                | ractopamine | 90274-24-1 | neomycin   | 1                       | 0                              | 0                              | 100.00              | 3.51                   | 10                       |  |
| by toxin                | ractopamine | 90274-24-1 | neomycin   | 1                       | 0                              | 25                             | 83.89               | 8.47                   | 10                       |  |
| by toxin                | ractopamine | 90274-24-1 | neomycin   | 1                       | 0                              | 50                             | 38.33               | 7.15                   | 10                       |  |
| by toxin                | ractopamine | 90274-24-1 | neomycin   | 1                       | 0                              | 100                            | 21.11               | 7.31                   | 10                       |  |
| by toxin                | ractopamine | 90274-24-1 | neomycin   | 1                       | 0                              | 200                            | 2.78                | 4.72                   | 10                       |  |
| by toxin                | ractopamine | 90274-24-1 | neomycin   | 1                       | 0                              | 400                            | 5.05                | 5.24                   | 11                       |  |
| by toxin                | ractopamine | 90274-24-1 | neomycin   | 1                       | 50                             | 0                              | 93.89               | 7.61                   | 10                       |  |
| by toxin                | ractopamine | 90274-24-1 | neomycin   | 1                       | 50                             | 25                             | 96.46               | 6.22                   | 11                       |  |
| by toxin                | ractopamine | 90274-24-1 | neomycin   | 1                       | 50                             | 50                             | 90.56               | 8.71                   | 10                       |  |
| by toxin                | ractopamine | 90274-24-1 | neomycin   | 1                       | 50                             | 100                            | 95.56               | 5.11                   | 10                       |  |
| by toxin                | ractopamine | 90274-24-1 | neomycin   | 1                       | 50                             | 200                            | 91.67               | 7.05                   | 10                       |  |
| by toxin                | ractopamine | 90274-24-1 | neomycin   | 1                       | 50                             | 400                            | 95.56               | 3.51                   | 10                       |  |
| by compound             | ractopamine | 90274-24-1 | gentamicin | 6                       | 0                              | 0                              | 93.41               | 9.04                   | 10                       |  |
| by compound             | ractopamine | 90274-24-1 | gentamicin | 6                       | 0.5                            | 0                              | 97.25               | 5.48                   | 10                       |  |
| by compound             | ractopamine | 90274-24-1 | gentamicin | 6                       | 1                              | 0                              | 87.30               | 7.34                   | 9                        |  |
| by compound             | ractopamine | 90274-24-1 | gentamicin | 6                       | 5                              | 0                              | 98.35               | 9.61                   | 10                       |  |
| by compound             | ractopamine | 90274-24-1 | gentamicin | 6                       | 10                             | 0                              | 98.90               | 6.67                   | 10                       |  |
| by compound             | ractopamine | 90274-24-1 | gentamicin | 6                       | 50                             | 0                              | 100.73              | 8.17                   | 9                        |  |
| by compound             | ractopamine | 90274-24-1 | gentamicin | 6                       | 100                            | 0                              | 94.51               | 8.53                   | 10                       |  |
| by compound             | ractopamine | 90274-24-1 | gentamicin | 6                       | 0                              | 200                            | 0.00                | 0.00                   | 10                       |  |
| by compound             | ractopamine | 90274-24-1 | gentamicin | 6                       | 0.5                            | 200                            | 13.43               | 12.63                  | 9                        |  |
| by compound             | ractopamine | 90274-24-1 | gentamicin | 6                       | 1                              | 200                            | 2.44                | 4.20                   | 9                        |  |
| by compound             | ractopamine | 90274-24-1 | gentamicin | 6                       | 5                              | 200                            | 24.73               | 10.98                  | 10                       |  |
| by compound             | ractopamine | 90274-24-1 | gentamicin | 6                       | 10                             | 200                            | 78.57               | 7.24                   | 10                       |  |
| by compound             | ractopamine | 90274-24-1 | gentamicin | 6                       | 50                             | 200                            | 92.80               | 4.52                   | 9                        |  |
| by compound             | ractopamine | 90274-24-1 | gentamicin | 6                       | 100                            | 200                            | 94.51               | 6.56                   | 10                       |  |
| by toxin                | ractopamine | 90274-24-1 | gentamicin | 6                       | 0                              | 0                              | 100.00              | 4.43                   | 10                       |  |
| by toxin                | ractopamine | 90274-24-1 | gentamicin | 6                       | 0                              | 25                             | 52.25               | 13.52                  | 10                       |  |
| by toxin                | ractopamine | 90274-24-1 | gentamicin | 6                       | 0                              | 50                             | 41.01               | 15.68                  | 10                       |  |
| by toxin                | ractopamine | 90274-24-1 | gentamicin | 6                       | 0                              | 100                            | 10.11               | 8.70                   | 10                       |  |
| by toxin                | ractopamine | 90274-24-1 | gentamicin | 6                       | 0                              | 200                            | 0.56                | 1.78                   | 10                       |  |
| by toxin                | ractopamine | 90274-24-1 | gentamicin | 6                       | 0                              | 400                            | 0.56                | 1.78                   | 10                       |  |
| by toxin                | ractopamine | 90274-24-1 | gentamicin | 6                       | 50                             | 0                              | 105.06              | 4.63                   | 10                       |  |
| by toxin                | ractopamine | 90274-24-1 | gentamicin | 6                       | 50                             | 25                             | 105.34              | 6.83                   | 12                       |  |
| by toxin                | ractopamine | 90274-24-1 | gentamicin | 6                       | 50                             | 50                             | 103.93              | 9.43                   | 12                       |  |
| by toxin                | ractopamine | 90274-24-1 | gentamicin | 6                       | 50                             | 100                            | 102.25              | 8.29                   | 10                       |  |
| by toxin                | ractopamine | 90274-24-1 | gentamicin | 6                       | 50                             | 200                            | 101.69              | 6.18                   | 10                       |  |
| by toxin                | ractopamine | 90274-24-1 | gentamicin | 6                       | 50                             | 400                            | 98.06               | 6.82                   | 11                       |  |
| by compound             | ractopamine | 90274-24-1 | kanamycin  | 24                      | 0                              | 0                              | 100.00              | 5.40                   | 11                       |  |
| by compound             | ractopamine | 90274-24-1 | kanamycin  | 24                      | 0.5                            | 0                              | 92.46               | 5.62                   | 9                        |  |
| by compound             | ractopamine | 90274-24-1 | kanamycin  | 24                      | 1                              | 0                              | 93.09               | 8.30                   | 12                       |  |
| by compound             | ractopamine | 90274-24-1 | kanamycin  | 24                      | 5                              | 0                              | 100.22              | 7.97                   | 12                       |  |
| by compound             | ractopamine | 90274-24-1 | kanamycin  | 24                      | 10                             | 0                              | 98.32               | 7.45                   | 12                       |  |
| by compound             | ractopamine | 90274-24-1 | kanamycin  | 24                      | 50                             | 0                              | 105.44              | 7.99                   | 12                       |  |
| by compound             | ractopamine | 90274-24-1 | kanamycin  | 24                      | 100                            | 0                              | 104.87              | 8.26                   | 10                       |  |
| by compound             | ractopamine | 90274-24-1 | kanamycin  | 24                      | 0                              | 400                            | 43.89               | 7.24                   | 10                       |  |
| by compound             | ractopamine | 90274-24-1 | kanamycin  | 24                      | 0.5                            | 400                            | 25.65               | 7.83                   | 10                       |  |
| by compound             | ractopamine | 90274-24-1 | kanamycin  | 24                      | 1                              | 400                            | 35.34               | 9.75                   | 10                       |  |
| by compound             | ractopamine | 90274-24-1 | kanamycin  | 24                      | 5                              | 400                            | 38.19               | 13.91                  | 10                       |  |
| by compound             | ractopamine | 90274-24-1 | kanamycin  | 24                      | 10                             | 400                            | 34.77               | 11.70                  | 10                       |  |
| by compound             | ractopamine | 90274-24-1 | kanamycin  | 24                      | 50                             | 400                            | 92.33               | 7.61                   | 10                       |  |
| by compound             | ractopamine | 90274-24-1 | kanamycin  | 24                      | 100                            | 400                            | 100.31              | 4.04                   | 10                       |  |
| by toxin                | ractopamine | 90274-24-1 | kanamycin  | 24                      | 0                              | 0                              | 100.00              | 6.34                   | 10                       |  |
| by toxin                | ractopamine | 90274-24-1 | kanamycin  | 24                      | 0                              | 25                             | 97.81               | 7.49                   | 10                       |  |
| by toxin                | ractopamine | 90274-24-1 | kanamycin  | 24                      | 0                              | 50                             | 91.26               | 5.79                   | 10                       |  |
| by toxin                | ractopamine | 90274-24-1 | kanamycin  | 24                      | 0                              | 100                            | 84.70               | 7.83                   | 10                       |  |
| by toxin                | ractopamine | 90274-24-1 | kanamycin  | 24                      | 0                              | 200                            | 59.02               | 9.91                   | 10                       |  |

| Experiment <sup>a</sup> | Compound    | Compound<br>CAS # | Toxin      | Toxin                   | Compound                | Toxin                   | Standard          |                        |                          |
|-------------------------|-------------|-------------------|------------|-------------------------|-------------------------|-------------------------|-------------------|------------------------|--------------------------|
|                         |             |                   |            | exposure                | concentration           | concentration           | Mean <sup>e</sup> | Deviation <sup>f</sup> | Sample size <sup>g</sup> |
|                         |             |                   |            | time (hrs) <sup>b</sup> | ( $\mu$ M) <sup>c</sup> | ( $\mu$ M) <sup>d</sup> |                   |                        |                          |
| by toxin                | ractopamine | 90274-24-1        | kanamycin  | 24                      | 0                       | 400                     | 37.70             | 7.92                   | 10                       |
| by toxin                | ractopamine | 90274-24-1        | kanamycin  | 24                      | 50                      | 0                       | 100.00            | 8.17                   | 10                       |
| by toxin                | ractopamine | 90274-24-1        | kanamycin  | 24                      | 50                      | 25                      | 104.92            | 6.20                   | 10                       |
| by toxin                | ractopamine | 90274-24-1        | kanamycin  | 24                      | 50                      | 50                      | 100.55            | 7.81                   | 10                       |
| by toxin                | ractopamine | 90274-24-1        | kanamycin  | 24                      | 50                      | 100                     | 98.36             | 8.15                   | 10                       |
| by toxin                | ractopamine | 90274-24-1        | kanamycin  | 24                      | 50                      | 200                     | 85.79             | 12.37                  | 10                       |
| by toxin                | ractopamine | 90274-24-1        | kanamycin  | 24                      | 50                      | 400                     | 63.39             | 22.04                  | 10                       |
| by compound             | ractopamine | 90274-24-1        | cisplatin  | 24                      | 0                       | 0                       | 100.00            | 6.18                   | 9                        |
| by compound             | ractopamine | 90274-24-1        | cisplatin  | 24                      | 0.5                     | 0                       | 100.00            | 6.18                   | 8                        |
| by compound             | ractopamine | 90274-24-1        | cisplatin  | 24                      | 1                       | 0                       | 100.69            | 7.20                   | 8                        |
| by compound             | ractopamine | 90274-24-1        | cisplatin  | 24                      | 5                       | 0                       | 100.00            | 9.77                   | 8                        |
| by compound             | ractopamine | 90274-24-1        | cisplatin  | 24                      | 10                      | 0                       | 102.78            | 5.35                   | 8                        |
| by compound             | ractopamine | 90274-24-1        | cisplatin  | 24                      | 50                      | 0                       | 100.00            | 8.74                   | 8                        |
| by compound             | ractopamine | 90274-24-1        | cisplatin  | 24                      | 100                     | 0                       | 102.08            | 9.24                   | 8                        |
| by compound             | ractopamine | 90274-24-1        | cisplatin  | 24                      | 0                       | 50                      | 10.42             | 5.73                   | 8                        |
| by compound             | ractopamine | 90274-24-1        | cisplatin  | 24                      | 0.5                     | 50                      | 8.33              | 8.17                   | 8                        |
| by compound             | ractopamine | 90274-24-1        | cisplatin  | 24                      | 1                       | 50                      | 9.72              | 8.60                   | 8                        |
| by compound             | ractopamine | 90274-24-1        | cisplatin  | 24                      | 5                       | 50                      | 0.00              | 0.00                   | 8                        |
| by compound             | ractopamine | 90274-24-1        | cisplatin  | 24                      | 10                      | 50                      | 0.00              | 0.00                   | 8                        |
| by compound             | ractopamine | 90274-24-1        | cisplatin  | 24                      | 50                      | 50                      | 4.17              | 8.03                   | 8                        |
| by compound             | ractopamine | 90274-24-1        | cisplatin  | 24                      | 100                     | 50                      | 6.94              | 6.73                   | 8                        |
| by compound             | raloxifene  | 82640-04-8        | neomycin   | 1                       | 0                       | 0                       | 100.00            | 14.20                  | 10                       |
| by compound             | raloxifene  | 82640-04-8        | neomycin   | 1                       | 0.5                     | 0                       | 112.96            | 5.08                   | 10                       |
| by compound             | raloxifene  | 82640-04-8        | neomycin   | 1                       | 1                       | 0                       | 103.09            | 12.70                  | 10                       |
| by compound             | raloxifene  | 82640-04-8        | neomycin   | 1                       | 5                       | 0                       | 110.49            | 6.79                   | 10                       |
| by compound             | raloxifene  | 82640-04-8        | neomycin   | 1                       | 10                      | 0                       | 108.02            | 7.84                   | 10                       |
| by compound             | raloxifene  | 82640-04-8        | neomycin   | 1                       | 50                      | 0                       | 54.32             | 16.67                  | 10                       |
| by compound             | raloxifene  | 82640-04-8        | neomycin   | 1                       | 100                     | 0                       | 33.95             | 17.58                  | 10                       |
| by compound             | raloxifene  | 82640-04-8        | neomycin   | 1                       | 0                       | 200                     | 4.32              | 4.17                   | 10                       |
| by compound             | raloxifene  | 82640-04-8        | neomycin   | 1                       | 0.5                     | 200                     | 8.64              | 5.96                   | 10                       |
| by compound             | raloxifene  | 82640-04-8        | neomycin   | 1                       | 1                       | 200                     | 16.46             | 6.17                   | 9                        |
| by compound             | raloxifene  | 82640-04-8        | neomycin   | 1                       | 5                       | 200                     | 71.33             | 15.77                  | 9                        |
| by compound             | raloxifene  | 82640-04-8        | neomycin   | 1                       | 10                      | 200                     | 103.70            | 6.38                   | 10                       |
| by compound             | raloxifene  | 82640-04-8        | neomycin   | 1                       | 50                      | 200                     | 61.73             | 12.35                  | 10                       |
| by compound             | raloxifene  | 82640-04-8        | neomycin   | 1                       | 100                     | 200                     | 33.33             | 10.57                  | 10                       |
| by toxin                | raloxifene  | 82640-04-8        | neomycin   | 1                       | 0                       | 0                       | 100.00            | 6.66                   | 10                       |
| by toxin                | raloxifene  | 82640-04-8        | neomycin   | 1                       | 0                       | 25                      | 82.74             | 8.35                   | 10                       |
| by toxin                | raloxifene  | 82640-04-8        | neomycin   | 1                       | 0                       | 50                      | 37.81             | 7.05                   | 10                       |
| by toxin                | raloxifene  | 82640-04-8        | neomycin   | 1                       | 0                       | 100                     | 20.82             | 7.21                   | 10                       |
| by toxin                | raloxifene  | 82640-04-8        | neomycin   | 1                       | 0                       | 200                     | 2.74              | 4.66                   | 10                       |
| by toxin                | raloxifene  | 82640-04-8        | neomycin   | 1                       | 0                       | 400                     | 4.98              | 5.17                   | 11                       |
| by toxin                | raloxifene  | 82640-04-8        | neomycin   | 1                       | 10                      | 0                       | 84.18             | 7.85                   | 11                       |
| by toxin                | raloxifene  | 82640-04-8        | neomycin   | 1                       | 10                      | 25                      | 78.21             | 8.87                   | 11                       |
| by toxin                | raloxifene  | 82640-04-8        | neomycin   | 1                       | 10                      | 50                      | 76.71             | 7.31                   | 10                       |
| by toxin                | raloxifene  | 82640-04-8        | neomycin   | 1                       | 10                      | 100                     | 77.26             | 6.03                   | 10                       |
| by toxin                | raloxifene  | 82640-04-8        | neomycin   | 1                       | 10                      | 200                     | 73.97             | 10.09                  | 10                       |
| by toxin                | raloxifene  | 82640-04-8        | neomycin   | 1                       | 10                      | 400                     | 73.42             | 10.07                  | 10                       |
| by compound             | raloxifene  | 82640-04-8        | gentamicin | 6                       | 0                       | 0                       | 100.00            | 7.59                   | 10                       |
| by compound             | raloxifene  | 82640-04-8        | gentamicin | 6                       | 0.5                     | 0                       | 109.88            | 7.59                   | 10                       |
| by compound             | raloxifene  | 82640-04-8        | gentamicin | 6                       | 1                       | 0                       | 109.43            | 14.89                  | 11                       |
| by compound             | raloxifene  | 82640-04-8        | gentamicin | 6                       | 5                       | 0                       | 110.55            | 8.03                   | 11                       |
| by compound             | raloxifene  | 82640-04-8        | gentamicin | 6                       | 10                      | 0                       | 111.73            | 9.85                   | 10                       |
| by compound             | raloxifene  | 82640-04-8        | gentamicin | 6                       | 50                      | 0                       | 43.21             | 9.26                   | 10                       |
| by compound             | raloxifene  | 82640-04-8        | gentamicin | 6                       | 0                       | 50                      | 32.10             | 15.34                  | 11                       |
| by compound             | raloxifene  | 82640-04-8        | gentamicin | 6                       | 0.5                     | 50                      | 31.48             | 16.58                  | 10                       |
| by compound             | raloxifene  | 82640-04-8        | gentamicin | 6                       | 1                       | 50                      | 28.81             | 7.56                   | 9                        |
| by compound             | raloxifene  | 82640-04-8        | gentamicin | 6                       | 5                       | 50                      | 50.00             | 16.83                  | 10                       |
| by compound             | raloxifene  | 82640-04-8        | gentamicin | 6                       | 10                      | 50                      | 101.85            | 6.00                   | 10                       |
| by compound             | raloxifene  | 82640-04-8        | gentamicin | 6                       | 50                      | 50                      | 32.72             | 11.29                  | 10                       |
| by toxin                | raloxifene  | 82640-04-8        | gentamicin | 6                       | 0                       | 0                       | 100.00            | 4.43                   | 10                       |
| by toxin                | raloxifene  | 82640-04-8        | gentamicin | 6                       | 0                       | 25                      | 52.25             | 13.52                  | 10                       |
| by toxin                | raloxifene  | 82640-04-8        | gentamicin | 6                       | 0                       | 50                      | 41.01             | 15.68                  | 10                       |
| by toxin                | raloxifene  | 82640-04-8        | gentamicin | 6                       | 0                       | 100                     | 10.11             | 8.70                   | 10                       |
| by toxin                | raloxifene  | 82640-04-8        | gentamicin | 6                       | 0                       | 200                     | 0.56              | 1.78                   | 10                       |
| by toxin                | raloxifene  | 82640-04-8        | gentamicin | 6                       | 0                       | 400                     | 0.56              | 1.78                   | 10                       |
| by toxin                | raloxifene  | 82640-04-8        | gentamicin | 6                       | 10                      | 0                       | 82.02             | 9.62                   | 10                       |
| by toxin                | raloxifene  | 82640-04-8        | gentamicin | 6                       | 10                      | 25                      | 88.76             | 11.17                  | 10                       |

| Experiment <sup>a</sup> | Compound   | Compound   |            | Toxin exposure          | Compound concentration  | Toxin concentration     | Standard          |                        |                          |
|-------------------------|------------|------------|------------|-------------------------|-------------------------|-------------------------|-------------------|------------------------|--------------------------|
|                         |            | CAS #      | Toxin      | time (hrs) <sup>b</sup> | ( $\mu$ M) <sup>c</sup> | ( $\mu$ M) <sup>d</sup> | Mean <sup>e</sup> | Deviation <sup>f</sup> | Sample size <sup>g</sup> |
| by toxin                | raloxifene | 82640-04-8 | gentamicin | 6                       | 10                      | 50                      | 90.45             | 10.07                  | 10                       |
| by toxin                | raloxifene | 82640-04-8 | gentamicin | 6                       | 10                      | 100                     | 93.26             | 8.46                   | 10                       |
| by toxin                | raloxifene | 82640-04-8 | gentamicin | 6                       | 10                      | 200                     | 79.21             | 15.09                  | 10                       |
| by toxin                | raloxifene | 82640-04-8 | gentamicin | 6                       | 10                      | 400                     | 89.89             | 5.62                   | 11                       |
| by compound             | raloxifene | 82640-04-8 | kanamycin  | 24                      | 0                       | 0                       | 100.00            | 9.07                   | 10                       |
| by compound             | raloxifene | 82640-04-8 | kanamycin  | 24                      | 0.5                     | 0                       | 110.60            | 6.28                   | 10                       |
| by compound             | raloxifene | 82640-04-8 | kanamycin  | 24                      | 1                       | 0                       | 112.58            | 13.25                  | 10                       |
| by compound             | raloxifene | 82640-04-8 | kanamycin  | 24                      | 5                       | 0                       | 113.91            | 8.72                   | 10                       |
| by compound             | raloxifene | 82640-04-8 | kanamycin  | 24                      | 10                      | 0                       | 108.44            | 10.58                  | 8                        |
| by compound             | raloxifene | 82640-04-8 | kanamycin  | 24                      | 0                       | 400                     | 42.22             | 6.07                   | 10                       |
| by compound             | raloxifene | 82640-04-8 | kanamycin  | 24                      | 0.5                     | 400                     | 35.76             | 10.45                  | 10                       |
| by compound             | raloxifene | 82640-04-8 | kanamycin  | 24                      | 1                       | 400                     | 31.79             | 10.72                  | 10                       |
| by compound             | raloxifene | 82640-04-8 | kanamycin  | 24                      | 5                       | 400                     | 46.36             | 27.75                  | 10                       |
| by compound             | raloxifene | 82640-04-8 | kanamycin  | 24                      | 10                      | 400                     | 50.33             | 12.57                  | 10                       |
| by compound             | raloxifene | 82640-04-8 | cisplatin  | 24                      | 0                       | 0                       | 100.00            | 5.68                   | 10                       |
| by compound             | raloxifene | 82640-04-8 | cisplatin  | 24                      | 0                       | 0                       | 100.00            | 7.68                   | 10                       |
| by compound             | raloxifene | 82640-04-8 | cisplatin  | 24                      | 0.5                     | 0                       | 98.67             | 4.86                   | 12                       |
| by compound             | raloxifene | 82640-04-8 | cisplatin  | 24                      | 1                       | 0                       | 105.52            | 9.05                   | 10                       |
| by compound             | raloxifene | 82640-04-8 | cisplatin  | 24                      | 2                       | 0                       | 111.66            | 5.64                   | 10                       |
| by compound             | raloxifene | 82640-04-8 | cisplatin  | 24                      | 5                       | 0                       | 108.20            | 10.37                  | 11                       |
| by compound             | raloxifene | 82640-04-8 | cisplatin  | 24                      | 0                       | 50                      | 10.43             | 10.45                  | 10                       |
| by compound             | raloxifene | 82640-04-8 | cisplatin  | 24                      | 0.5                     | 50                      | 7.98              | 11.59                  | 10                       |
| by compound             | raloxifene | 82640-04-8 | cisplatin  | 24                      | 1                       | 50                      | 9.82              | 9.24                   | 10                       |
| by compound             | raloxifene | 82640-04-8 | cisplatin  | 24                      | 2                       | 50                      | 7.81              | 9.54                   | 11                       |
| by compound             | raloxifene | 82640-04-8 | cisplatin  | 24                      | 5                       | 50                      | 4.29              | 5.82                   | 10                       |
| by compound             | tamoxifen  | 10540-29-1 | neomycin   | 1                       | 0                       | 0                       | 100.00            | 7.90                   | 10                       |
| by compound             | tamoxifen  | 10540-29-1 | neomycin   | 1                       | 1                       | 0                       | 108.39            | 9.42                   | 10                       |
| by compound             | tamoxifen  | 10540-29-1 | neomycin   | 1                       | 5                       | 0                       | 100.73            | 8.05                   | 9                        |
| by compound             | tamoxifen  | 10540-29-1 | neomycin   | 1                       | 10                      | 0                       | 91.97             | 14.09                  | 11                       |
| by compound             | tamoxifen  | 10540-29-1 | neomycin   | 1                       | 0                       | 200                     | 1.97              | 4.43                   | 10                       |
| by compound             | tamoxifen  | 10540-29-1 | neomycin   | 1                       | 1                       | 200                     | 18.89             | 13.34                  | 8                        |
| by compound             | tamoxifen  | 10540-29-1 | neomycin   | 1                       | 5                       | 200                     | 51.90             | 11.77                  | 10                       |
| by compound             | tamoxifen  | 10540-29-1 | neomycin   | 1                       | 10                      | 200                     | 63.50             | 10.39                  | 9                        |
| by toxin                | tamoxifen  | 10540-29-1 | neomycin   | 1                       | 0                       | 0                       | 100.00            | 6.17                   | 10                       |
| by toxin                | tamoxifen  | 10540-29-1 | neomycin   | 1                       | 0                       | 25                      | 86.29             | 8.71                   | 10                       |
| by toxin                | tamoxifen  | 10540-29-1 | neomycin   | 1                       | 0                       | 50                      | 39.43             | 7.35                   | 10                       |
| by toxin                | tamoxifen  | 10540-29-1 | neomycin   | 1                       | 0                       | 100                     | 21.71             | 7.52                   | 10                       |
| by toxin                | tamoxifen  | 10540-29-1 | neomycin   | 1                       | 0                       | 200                     | 2.86              | 4.86                   | 10                       |
| by toxin                | tamoxifen  | 10540-29-1 | neomycin   | 1                       | 0                       | 400                     | 5.19              | 5.39                   | 11                       |
| by toxin                | tamoxifen  | 10540-29-1 | neomycin   | 1                       | 10                      | 0                       | 92.47             | 4.99                   | 11                       |
| by toxin                | tamoxifen  | 10540-29-1 | neomycin   | 1                       | 10                      | 25                      | 78.44             | 10.87                  | 11                       |
| by toxin                | tamoxifen  | 10540-29-1 | neomycin   | 1                       | 10                      | 50                      | 83.43             | 14.05                  | 10                       |
| by toxin                | tamoxifen  | 10540-29-1 | neomycin   | 1                       | 10                      | 100                     | 68.00             | 8.71                   | 10                       |
| by toxin                | tamoxifen  | 10540-29-1 | neomycin   | 1                       | 10                      | 200                     | 58.29             | 4.51                   | 10                       |
| by toxin                | tamoxifen  | 10540-29-1 | neomycin   | 1                       | 10                      | 400                     | 48.00             | 6.71                   | 10                       |
| by compound             | tamoxifen  | 10540-29-1 | gentamicin | 6                       | 0                       | 0                       | 100.00            | 6.33                   | 10                       |
| by compound             | tamoxifen  | 10540-29-1 | gentamicin | 6                       | 0.5                     | 0                       | 96.83             | 9.68                   | 10                       |
| by compound             | tamoxifen  | 10540-29-1 | gentamicin | 6                       | 1                       | 0                       | 101.59            | 8.57                   | 10                       |
| by compound             | tamoxifen  | 10540-29-1 | gentamicin | 6                       | 5                       | 0                       | 94.76             | 8.35                   | 11                       |
| by compound             | tamoxifen  | 10540-29-1 | gentamicin | 6                       | 10                      | 0                       | 79.81             | 16.80                  | 12                       |
| by compound             | tamoxifen  | 10540-29-1 | gentamicin | 6                       | 0                       | 50                      | 31.22             | 11.28                  | 10                       |
| by compound             | tamoxifen  | 10540-29-1 | gentamicin | 6                       | 0.5                     | 50                      | 19.58             | 14.12                  | 10                       |
| by compound             | tamoxifen  | 10540-29-1 | gentamicin | 6                       | 1                       | 50                      | 19.05             | 12.27                  | 10                       |
| by compound             | tamoxifen  | 10540-29-1 | gentamicin | 6                       | 5                       | 50                      | 31.27             | 6.88                   | 11                       |
| by compound             | tamoxifen  | 10540-29-1 | gentamicin | 6                       | 10                      | 50                      | 14.29             | 9.99                   | 10                       |
| by compound             | tamoxifen  | 10540-29-1 | gentamicin | 1                       | 0                       | 0                       | 101.86            | 6.00                   | 10                       |
| by compound             | tamoxifen  | 10540-29-1 | gentamicin | 1                       | 0.5                     | 0                       | 104.90            | 5.76                   | 9                        |
| by compound             | tamoxifen  | 10540-29-1 | gentamicin | 1                       | 1                       | 0                       | 109.32            | 6.00                   | 10                       |
| by compound             | tamoxifen  | 10540-29-1 | gentamicin | 1                       | 5                       | 0                       | 104.97            | 7.44                   | 10                       |
| by compound             | tamoxifen  | 10540-29-1 | gentamicin | 1                       | 10                      | 0                       | 98.14             | 5.71                   | 10                       |
| by compound             | tamoxifen  | 10540-29-1 | gentamicin | 1                       | 0                       | 200                     | 44.10             | 13.87                  | 9                        |
| by compound             | tamoxifen  | 10540-29-1 | gentamicin | 1                       | 0.5                     | 200                     | 43.48             | 5.86                   | 10                       |
| by compound             | tamoxifen  | 10540-29-1 | gentamicin | 1                       | 1                       | 200                     | 45.17             | 7.40                   | 11                       |
| by compound             | tamoxifen  | 10540-29-1 | gentamicin | 1                       | 5                       | 200                     | 79.37             | 15.77                  | 9                        |
| by compound             | tamoxifen  | 10540-29-1 | gentamicin | 1                       | 10                      | 200                     | 70.39             | 9.32                   | 9                        |
| by toxin                | tamoxifen  | 10540-29-1 | gentamicin | 1                       | 0                       | 0                       | 100.00            | 7.00                   | 10                       |
| by toxin                | tamoxifen  | 10540-29-1 | gentamicin | 1                       | 0                       | 25                      | 96.82             | 5.16                   | 9                        |

| Experiment <sup>a</sup> | Compound  | Compound<br>CAS # | Toxin      | Toxin                   | Compound                | Toxin                   | Standard          |                        |                          |
|-------------------------|-----------|-------------------|------------|-------------------------|-------------------------|-------------------------|-------------------|------------------------|--------------------------|
|                         |           |                   |            | exposure                | concentration           | concentration           | Mean <sup>e</sup> | Deviation <sup>f</sup> | Sample size <sup>g</sup> |
|                         |           |                   |            | time (hrs) <sup>b</sup> | ( $\mu$ M) <sup>c</sup> | ( $\mu$ M) <sup>d</sup> |                   |                        |                          |
| by toxin                | tamoxifen | 10540-29-1        | gentamicin | 1                       | 0                       | 50                      | 66.67             | 8.36                   | 10                       |
| by toxin                | tamoxifen | 10540-29-1        | gentamicin | 1                       | 0                       | 100                     | 45.03             | 9.57                   | 10                       |
| by toxin                | tamoxifen | 10540-29-1        | gentamicin | 1                       | 0                       | 200                     | 42.24             | 8.66                   | 9                        |
| by toxin                | tamoxifen | 10540-29-1        | gentamicin | 1                       | 0                       | 400                     | 33.92             | 6.04                   | 10                       |
| by toxin                | tamoxifen | 10540-29-1        | gentamicin | 1                       | 10                      | 0                       | 104.09            | 9.06                   | 10                       |
| by toxin                | tamoxifen | 10540-29-1        | gentamicin | 1                       | 10                      | 25                      | 99.42             | 8.27                   | 10                       |
| by toxin                | tamoxifen | 10540-29-1        | gentamicin | 1                       | 10                      | 50                      | 98.25             | 7.70                   | 10                       |
| by toxin                | tamoxifen | 10540-29-1        | gentamicin | 1                       | 10                      | 100                     | 82.52             | 11.11                  | 9                        |
| by toxin                | tamoxifen | 10540-29-1        | gentamicin | 1                       | 10                      | 200                     | 67.25             | 6.89                   | 10                       |
| by toxin                | tamoxifen | 10540-29-1        | gentamicin | 1                       | 10                      | 400                     | 55.88             | 6.61                   | 9                        |
| by compound             | tamoxifen | 10540-29-1        | kanamycin  | 24                      | 0                       | 0                       | 100.00            | 11.13                  | 10                       |
| by compound             | tamoxifen | 10540-29-1        | kanamycin  | 24                      | 0.5                     | 0                       | 109.32            | 6.68                   | 10                       |
| by compound             | tamoxifen | 10540-29-1        | kanamycin  | 24                      | 1                       | 0                       | 101.24            | 7.77                   | 10                       |
| by compound             | tamoxifen | 10540-29-1        | kanamycin  | 24                      | 0                       | 400                     | 46.24             | 9.37                   | 9                        |
| by compound             | tamoxifen | 10540-29-1        | kanamycin  | 24                      | 0.5                     | 400                     | 36.02             | 11.26                  | 10                       |
| by compound             | tamoxifen | 10540-29-1        | kanamycin  | 24                      | 1                       | 400                     | 46.58             | 7.88                   | 10                       |
| by compound             | tamoxifen | 10540-29-1        | cisplatin  | 24                      | 0                       | 0                       | 100               | 7.8366737              | 10                       |
| by compound             | tamoxifen | 10540-29-1        | cisplatin  | 24                      | 0.5                     | 0                       | 104.1667          | 11.654107              | 10                       |
| by compound             | tamoxifen | 10540-29-1        | cisplatin  | 24                      | 1                       | 0                       | 96.43             | 11.15                  | 10                       |
| by compound             | tamoxifen | 10540-29-1        | cisplatin  | 24                      | 5                       | 0                       | 104.98            | 10.06                  | 11                       |
| by compound             | tamoxifen | 10540-29-1        | cisplatin  | 24                      | 0                       | 50                      | 11.90             | 8.87                   | 10                       |
| by compound             | tamoxifen | 10540-29-1        | cisplatin  | 24                      | 0.5                     | 50                      | 20.02             | 8.11                   | 11                       |
| by compound             | tamoxifen | 10540-29-1        | cisplatin  | 24                      | 1                       | 50                      | 21.16             | 13.67                  | 9                        |
| by compound             | tamoxifen | 10540-29-1        | cisplatin  | 24                      | 5                       | 50                      | 1.79              | 5.65                   | 10                       |
| by compound             | amiloride | 2016-88-8         | cisplatin  | 24                      | 0                       | 0                       | 100.00            | 5.39                   | 11                       |
| by compound             | amiloride | 2016-88-8         | cisplatin  | 24                      | 0.5                     | 0                       | 90.78             | 6.17                   | 10                       |
| by compound             | amiloride | 2016-88-8         | cisplatin  | 24                      | 1                       | 0                       | 97.09             | 9.79                   | 11                       |
| by compound             | amiloride | 2016-88-8         | cisplatin  | 24                      | 5                       | 0                       | 99.32             | 9.49                   | 10                       |
| by compound             | amiloride | 2016-88-8         | cisplatin  | 24                      | 10                      | 0                       | 86.50             | 9.68                   | 10                       |
| by compound             | amiloride | 2016-88-8         | cisplatin  | 24                      | 50                      | 0                       | 98.25             | 8.79                   | 10                       |
| by compound             | amiloride | 2016-88-8         | cisplatin  | 24                      | 100                     | 0                       | 99.32             | 7.64                   | 10                       |
| by compound             | amiloride | 2016-88-8         | cisplatin  | 24                      | 0                       | 50                      | 21.84             | 7.34                   | 11                       |
| by compound             | amiloride | 2016-88-8         | cisplatin  | 24                      | 0.5                     | 50                      | 26.21             | 6.52                   | 11                       |
| by compound             | amiloride | 2016-88-8         | cisplatin  | 24                      | 1                       | 50                      | 14.24             | 8.62                   | 12                       |
| by compound             | amiloride | 2016-88-8         | cisplatin  | 24                      | 5                       | 50                      | 3.74              | 6.19                   | 10                       |
| by compound             | amiloride | 2016-88-8         | cisplatin  | 24                      | 10                      | 50                      | 23.50             | 6.27                   | 10                       |
| by compound             | amiloride | 2016-88-8         | cisplatin  | 24                      | 50                      | 50                      | 0.89              | 3.08                   | 12                       |
| by compound             | amiloride | 2016-88-8         | cisplatin  | 24                      | 100                     | 50                      | 0.00              | 0.00                   | 12                       |
| by compound             | MPP       | 289726-02-9       | neomycin   | 1                       | 0                       | 0                       | 100.00            | 5.76                   | 10                       |
| by compound             | MPP       | 289726-02-9       | neomycin   | 1                       | 0.5                     | 0                       | 97.73             | 6.41                   | 9                        |
| by compound             | MPP       | 289726-02-9       | neomycin   | 1                       | 1                       | 0                       | 97.15             | 7.46                   | 9                        |
| by compound             | MPP       | 289726-02-9       | neomycin   | 1                       | 5                       | 0                       | 94.82             | 8.86                   | 9                        |
| by compound             | MPP       | 289726-02-9       | neomycin   | 1                       | 10                      | 0                       | 102.97            | 3.70                   | 9                        |
| by compound             | MPP       | 289726-02-9       | neomycin   | 1                       | 50                      | 0                       | 58.25             | 10.63                  | 8                        |
| by compound             | MPP       | 289726-02-9       | neomycin   | 1                       | 100                     | 0                       | 44.50             | 8.85                   | 8                        |
| by compound             | MPP       | 289726-02-9       | neomycin   | 1                       | 0                       | 200                     | 2.09              | 5.06                   | 10                       |
| by compound             | MPP       | 289726-02-9       | neomycin   | 1                       | 0.5                     | 200                     | 1.96              | 2.71                   | 8                        |
| by compound             | MPP       | 289726-02-9       | neomycin   | 1                       | 1                       | 200                     | 10.47             | 9.44                   | 9                        |
| by compound             | MPP       | 289726-02-9       | neomycin   | 1                       | 5                       | 200                     | 92.50             | 4.53                   | 9                        |
| by compound             | MPP       | 289726-02-9       | neomycin   | 1                       | 10                      | 200                     | 95.40             | 5.72                   | 9                        |
| by compound             | MPP       | 289726-02-9       | neomycin   | 1                       | 50                      | 200                     | 50.03             | 5.31                   | 9                        |
| by compound             | MPP       | 289726-02-9       | neomycin   | 1                       | 100                     | 200                     | 5.24              | 6.26                   | 8                        |
| by toxin                | MPP       | 289726-02-9       | neomycin   | 1                       | 0                       | 0                       | 100.00            | 7.67                   | 11                       |
| by toxin                | MPP       | 289726-02-9       | neomycin   | 1                       | 0                       | 25                      | 93.72             | 6.04                   | 10                       |
| by toxin                | MPP       | 289726-02-9       | neomycin   | 1                       | 0                       | 50                      | 58.37             | 6.12                   | 10                       |
| by toxin                | MPP       | 289726-02-9       | neomycin   | 1                       | 0                       | 100                     | 32.55             | 9.13                   | 10                       |
| by toxin                | MPP       | 289726-02-9       | neomycin   | 1                       | 0                       | 200                     | 7.30              | 6.97                   | 10                       |
| by toxin                | MPP       | 289726-02-9       | neomycin   | 1                       | 0                       | 400                     | 3.37              | 5.60                   | 10                       |
| by toxin                | MPP       | 289726-02-9       | neomycin   | 1                       | 10                      | 0                       | 107.65            | 5.62                   | 11                       |
| by toxin                | MPP       | 289726-02-9       | neomycin   | 1                       | 10                      | 25                      | 103.83            | 5.07                   | 10                       |
| by toxin                | MPP       | 289726-02-9       | neomycin   | 1                       | 10                      | 50                      | 102.14            | 5.92                   | 10                       |
| by toxin                | MPP       | 289726-02-9       | neomycin   | 1                       | 10                      | 100                     | 106.63            | 6.50                   | 10                       |
| by toxin                | MPP       | 289726-02-9       | neomycin   | 1                       | 10                      | 200                     | 102.04            | 6.92                   | 11                       |
| by toxin                | MPP       | 289726-02-9       | neomycin   | 1                       | 10                      | 400                     | 99.34             | 6.97                   | 10                       |
| by compound             | MPP       | 289726-02-9       | gentamicin | 6                       | 0                       | 0                       | 100.00            | 4.27                   | 10                       |
| by compound             | MPP       | 289726-02-9       | gentamicin | 6                       | 0.5                     | 0                       | 98.96             | 6.20                   | 10                       |

| Experiment <sup>a</sup> | Compound   | Compound    |            | Toxin                   | Compound                | Toxin                   | Standard          |                        |                          |
|-------------------------|------------|-------------|------------|-------------------------|-------------------------|-------------------------|-------------------|------------------------|--------------------------|
|                         |            | CAS #       | Toxin      | exposure                | concentration           | concentration           | Mean <sup>e</sup> | Deviation <sup>f</sup> | Sample size <sup>g</sup> |
|                         |            |             |            | time (hrs) <sup>b</sup> | ( $\mu$ M) <sup>c</sup> | ( $\mu$ M) <sup>d</sup> |                   |                        |                          |
| by compound             | MPP        | 289726-02-9 | gentamicin | 6                       | 1                       | 0                       | 100.00            | 4.27                   | 10                       |
| by compound             | MPP        | 289726-02-9 | gentamicin | 6                       | 5                       | 0                       | 95.85             | 5.04                   | 10                       |
| by compound             | MPP        | 289726-02-9 | gentamicin | 6                       | 10                      | 0                       | 97.03             | 4.69                   | 11                       |
| by compound             | MPP        | 289726-02-9 | gentamicin | 6                       | 50                      | 0                       | 76.86             | 11.23                  | 12                       |
| by compound             | MPP        | 289726-02-9 | gentamicin | 6                       | 100                     | 0                       | 30.15             | 9.22                   | 11                       |
| by compound             | MPP        | 289726-02-9 | gentamicin | 6                       | 0                       | 50                      | 35.23             | 13.11                  | 10                       |
| by compound             | MPP        | 289726-02-9 | gentamicin | 6                       | 0.5                     | 50                      | 47.15             | 8.62                   | 10                       |
| by compound             | MPP        | 289726-02-9 | gentamicin | 6                       | 1                       | 50                      | 43.52             | 6.55                   | 10                       |
| by compound             | MPP        | 289726-02-9 | gentamicin | 6                       | 5                       | 50                      | 93.78             | 5.15                   | 10                       |
| by compound             | MPP        | 289726-02-9 | gentamicin | 6                       | 10                      | 50                      | 95.34             | 5.57                   | 10                       |
| by compound             | MPP        | 289726-02-9 | gentamicin | 6                       | 50                      | 50                      | 85.49             | 6.58                   | 10                       |
| by compound             | MPP        | 289726-02-9 | gentamicin | 6                       | 100                     | 50                      | 22.80             | 7.41                   | 10                       |
| by compound             | toremifene | 89778-27-8  | neomycin   | 1                       | 0                       | 0                       | 100.00            | 6.09                   | 9                        |
| by compound             | toremifene | 89778-27-8  | neomycin   | 1                       | 0.5                     | 0                       | 92.96             | 12.13                  | 8                        |
| by compound             | toremifene | 89778-27-8  | neomycin   | 1                       | 1                       | 0                       | 88.92             | 10.38                  | 8                        |
| by compound             | toremifene | 89778-27-8  | neomycin   | 1                       | 5                       | 0                       | 90.94             | 6.07                   | 8                        |
| by compound             | toremifene | 89778-27-8  | neomycin   | 1                       | 10                      | 0                       | 79.49             | 12.80                  | 8                        |
| by compound             | toremifene | 89778-27-8  | neomycin   | 1                       | 0                       | 200                     | 8.08              | 11.15                  | 8                        |
| by compound             | toremifene | 89778-27-8  | neomycin   | 1                       | 0.5                     | 200                     | 17.51             | 8.02                   | 8                        |
| by compound             | toremifene | 89778-27-8  | neomycin   | 1                       | 1                       | 200                     | 20.21             | 11.43                  | 8                        |
| by compound             | toremifene | 89778-27-8  | neomycin   | 1                       | 5                       | 200                     | 42.51             | 6.84                   | 9                        |
| by compound             | toremifene | 89778-27-8  | neomycin   | 1                       | 10                      | 200                     | 56.59             | 7.62                   | 8                        |
| by toxin                | toremifene | 89778-27-8  | neomycin   | 1                       | 0                       | 0                       | 100.01            | 18.00                  | 7                        |
| by toxin                | toremifene | 89778-27-8  | neomycin   | 1                       | 0                       | 25                      | 96.50             | 15.32                  | 10                       |
| by toxin                | toremifene | 89778-27-8  | neomycin   | 1                       | 0                       | 50                      | 57.62             | 20.92                  | 11                       |
| by toxin                | toremifene | 89778-27-8  | neomycin   | 1                       | 0                       | 100                     | 48.25             | 15.74                  | 10                       |
| by toxin                | toremifene | 89778-27-8  | neomycin   | 1                       | 0                       | 200                     | 52.03             | 15.61                  | 10                       |
| by toxin                | toremifene | 89778-27-8  | neomycin   | 1                       | 0                       | 400                     | 8.51              | 12.96                  | 10                       |
| by toxin                | toremifene | 89778-27-8  | neomycin   | 1                       | 10                      | 0                       | 134.34            | 26.68                  | 10                       |
| by toxin                | toremifene | 89778-27-8  | neomycin   | 1                       | 10                      | 25                      | 119.21            | 15.58                  | 10                       |
| by toxin                | toremifene | 89778-27-8  | neomycin   | 1                       | 10                      | 50                      | 124.88            | 25.93                  | 10                       |
| by toxin                | toremifene | 89778-27-8  | neomycin   | 1                       | 10                      | 100                     | 79.99             | 16.58                  | 11                       |
| by toxin                | toremifene | 89778-27-8  | neomycin   | 1                       | 10                      | 200                     | 107.85            | 11.97                  | 10                       |
| by toxin                | toremifene | 89778-27-8  | neomycin   | 1                       | 10                      | 400                     | 81.36             | 21.48                  | 10                       |
| by compound             | toremifene | 89778-27-8  | gentamicin | 6                       | 0                       | 0                       | 100.00            | 6.33                   | 10                       |
| by compound             | toremifene | 89778-27-8  | gentamicin | 6                       | 0.5                     | 0                       | 102.65            | 3.70                   | 10                       |
| by compound             | toremifene | 89778-27-8  | gentamicin | 6                       | 1                       | 0                       | 99.47             | 7.81                   | 10                       |
| by compound             | toremifene | 89778-27-8  | gentamicin | 6                       | 5                       | 0                       | 98.41             | 6.21                   | 10                       |
| by compound             | toremifene | 89778-27-8  | gentamicin | 6                       | 10                      | 0                       | 80.95             | 17.65                  | 10                       |
| by compound             | toremifene | 89778-27-8  | gentamicin | 6                       | 0                       | 50                      | 31.22             | 11.28                  | 10                       |
| by compound             | toremifene | 89778-27-8  | gentamicin | 6                       | 0.5                     | 50                      | 25.93             | 7.25                   | 10                       |
| by compound             | toremifene | 89778-27-8  | gentamicin | 6                       | 1                       | 50                      | 28.57             | 12.52                  | 10                       |
| by compound             | toremifene | 89778-27-8  | gentamicin | 6                       | 5                       | 50                      | 38.10             | 11.65                  | 10                       |
| by compound             | toremifene | 89778-27-8  | gentamicin | 6                       | 10                      | 50                      | 17.99             | 12.27                  | 10                       |
| by compound             | toremifene | 89778-27-8  | gentamicin | 1                       | 0                       | 0                       | 100.00            | 6.86                   | 10                       |
| by compound             | toremifene | 89778-27-8  | gentamicin | 1                       | 0.5                     | 0                       | 86.49             | 8.45                   | 10                       |
| by compound             | toremifene | 89778-27-8  | gentamicin | 1                       | 1                       | 0                       | 92.97             | 7.98                   | 10                       |
| by compound             | toremifene | 89778-27-8  | gentamicin | 1                       | 5                       | 0                       | 91.89             | 3.60                   | 10                       |
| by compound             | toremifene | 89778-27-8  | gentamicin | 1                       | 10                      | 0                       | 87.57             | 8.37                   | 10                       |
| by compound             | toremifene | 89778-27-8  | gentamicin | 1                       | 0                       | 200                     | 40.54             | 6.86                   | 10                       |
| by compound             | toremifene | 89778-27-8  | gentamicin | 1                       | 0.5                     | 200                     | 41.62             | 9.55                   | 10                       |
| by compound             | toremifene | 89778-27-8  | gentamicin | 1                       | 1                       | 200                     | 42.70             | 7.41                   | 10                       |
| by compound             | toremifene | 89778-27-8  | gentamicin | 1                       | 5                       | 200                     | 47.57             | 7.12                   | 10                       |
| by compound             | toremifene | 89778-27-8  | gentamicin | 1                       | 10                      | 200                     | 67.03             | 14.23                  | 10                       |
| by toxin                | toremifene | 89778-27-8  | gentamicin | 1                       | 0                       | 0                       | 100.01            | 18.00                  | 7                        |
| by toxin                | toremifene | 89778-27-8  | gentamicin | 1                       | 0                       | 25                      | 94.61             | 23.60                  | 10                       |
| by toxin                | toremifene | 89778-27-8  | gentamicin | 1                       | 0                       | 50                      | 83.25             | 15.96                  | 10                       |
| by toxin                | toremifene | 89778-27-8  | gentamicin | 1                       | 0                       | 100                     | 80.42             | 22.41                  | 10                       |
| by toxin                | toremifene | 89778-27-8  | gentamicin | 1                       | 0                       | 200                     | 59.60             | 19.97                  | 10                       |
| by toxin                | toremifene | 89778-27-8  | gentamicin | 1                       | 0                       | 400                     | 45.41             | 23.09                  | 10                       |
| by toxin                | toremifene | 89778-27-8  | gentamicin | 1                       | 10                      | 0                       | 134.34            | 26.68                  | 10                       |
| by toxin                | toremifene | 89778-27-8  | gentamicin | 1                       | 10                      | 25                      | 105.96            | 23.51                  | 10                       |
| by toxin                | toremifene | 89778-27-8  | gentamicin | 1                       | 10                      | 50                      | 125.57            | 21.61                  | 11                       |
| by toxin                | toremifene | 89778-27-8  | gentamicin | 1                       | 10                      | 100                     | 97.76             | 19.50                  | 9                        |
| by toxin                | toremifene | 89778-27-8  | gentamicin | 1                       | 10                      | 200                     | 98.39             | 14.93                  | 10                       |
| by toxin                | toremifene | 89778-27-8  | gentamicin | 1                       | 10                      | 400                     | 103.12            | 15.09                  | 10                       |

| Experiment <sup>a</sup> | Compound    | Compound<br>CAS # | Toxin      | Toxin<br>exposure       | Compound<br>concentration | Toxin<br>concentration  | Standard          |                        |                          |
|-------------------------|-------------|-------------------|------------|-------------------------|---------------------------|-------------------------|-------------------|------------------------|--------------------------|
|                         |             |                   |            | time (hrs) <sup>b</sup> | ( $\mu$ M) <sup>c</sup>   | ( $\mu$ M) <sup>d</sup> | Mean <sup>e</sup> | Deviation <sup>f</sup> | Sample size <sup>g</sup> |
| by compound             | afimoxifene | 68392-35-8        | neomycin   | 1                       | 0                         | 0                       | 100.00            | 6.69                   | 10                       |
| by compound             | afimoxifene | 68392-35-8        | neomycin   | 1                       | 0.5                       | 0                       | 101.57            | 4.25                   | 10                       |
| by compound             | afimoxifene | 68392-35-8        | neomycin   | 1                       | 1                         | 0                       | 98.95             | 7.82                   | 10                       |
| by compound             | afimoxifene | 68392-35-8        | neomycin   | 1                       | 5                         | 0                       | 96.57             | 9.17                   | 9                        |
| by compound             | afimoxifene | 68392-35-8        | neomycin   | 1                       | 10                        | 0                       | 90.05             | 11.39                  | 10                       |
| by compound             | afimoxifene | 68392-35-8        | neomycin   | 1                       | 0                         | 200                     | 2.09              | 5.87                   | 10                       |
| by compound             | afimoxifene | 68392-35-8        | neomycin   | 1                       | 0.5                       | 200                     | 2.33              | 6.16                   | 9                        |
| by compound             | afimoxifene | 68392-35-8        | neomycin   | 1                       | 1                         | 200                     | 6.40              | 9.01                   | 9                        |
| by compound             | afimoxifene | 68392-35-8        | neomycin   | 1                       | 5                         | 200                     | 20.36             | 12.33                  | 9                        |
| by compound             | afimoxifene | 68392-35-8        | neomycin   | 1                       | 10                        | 200                     | 47.12             | 9.50                   | 10                       |
| by toxin                | afimoxifene | 68392-35-8        | neomycin   | 1                       | 0                         | 0                       | 100.00            | 8.26                   | 11                       |
| by toxin                | afimoxifene | 68392-35-8        | neomycin   | 1                       | 0                         | 25                      | 93.72             | 6.51                   | 10                       |
| by toxin                | afimoxifene | 68392-35-8        | neomycin   | 1                       | 0                         | 50                      | 58.37             | 6.59                   | 10                       |
| by toxin                | afimoxifene | 68392-35-8        | neomycin   | 1                       | 0                         | 100                     | 32.55             | 9.83                   | 10                       |
| by toxin                | afimoxifene | 68392-35-8        | neomycin   | 1                       | 0                         | 200                     | 7.30              | 7.51                   | 10                       |
| by toxin                | afimoxifene | 68392-35-8        | neomycin   | 1                       | 0                         | 400                     | 3.37              | 6.03                   | 10                       |
| by toxin                | afimoxifene | 68392-35-8        | neomycin   | 1                       | 50                        | 0                       | 96.53             | 10.52                  | 10                       |
| by toxin                | afimoxifene | 68392-35-8        | neomycin   | 1                       | 50                        | 25                      | 97.65             | 5.42                   | 10                       |
| by toxin                | afimoxifene | 68392-35-8        | neomycin   | 1                       | 50                        | 50                      | 94.29             | 3.55                   | 10                       |
| by toxin                | afimoxifene | 68392-35-8        | neomycin   | 1                       | 50                        | 100                     | 65.10             | 14.54                  | 10                       |
| by toxin                | afimoxifene | 68392-35-8        | neomycin   | 1                       | 50                        | 200                     | 39.29             | 11.22                  | 10                       |
| by toxin                | afimoxifene | 68392-35-8        | neomycin   | 1                       | 50                        | 400                     | 31.63             | 8.43                   | 11                       |
| by compound             | afimoxifene | 68392-35-8        | gentamicin | 6                       | 0                         | 0                       | 100.00            | 5.00                   | 10                       |
| by compound             | afimoxifene | 68392-35-8        | gentamicin | 6                       | 0.5                       | 0                       | 101.04            | 5.17                   | 10                       |
| by compound             | afimoxifene | 68392-35-8        | gentamicin | 6                       | 1                         | 0                       | 100.52            | 5.13                   | 10                       |
| by compound             | afimoxifene | 68392-35-8        | gentamicin | 6                       | 5                         | 0                       | 101.55            | 4.25                   | 10                       |
| by compound             | afimoxifene | 68392-35-8        | gentamicin | 6                       | 10                        | 0                       | 91.85             | 7.24                   | 11                       |
| by compound             | afimoxifene | 68392-35-8        | gentamicin | 6                       | 0                         | 50                      | 35.23             | 15.38                  | 10                       |
| by compound             | afimoxifene | 68392-35-8        | gentamicin | 6                       | 0.5                       | 50                      | 33.68             | 8.72                   | 10                       |
| by compound             | afimoxifene | 68392-35-8        | gentamicin | 6                       | 1                         | 50                      | 30.05             | 9.42                   | 10                       |
| by compound             | afimoxifene | 68392-35-8        | gentamicin | 6                       | 5                         | 50                      | 35.84             | 7.97                   | 12                       |
| by compound             | afimoxifene | 68392-35-8        | gentamicin | 6                       | 10                        | 50                      | 38.00             | 13.55                  | 12                       |
| by compound             | afimoxifene | 68392-35-8        | gentamicin | 1                       | 0                         | 0                       | 100.00            | 7.16                   | 10                       |
| by compound             | afimoxifene | 68392-35-8        | gentamicin | 1                       | 0.5                       | 0                       | 103.24            | 6.05                   | 10                       |
| by compound             | afimoxifene | 68392-35-8        | gentamicin | 1                       | 1                         | 0                       | 98.38             | 7.47                   | 10                       |
| by compound             | afimoxifene | 68392-35-8        | gentamicin | 1                       | 5                         | 0                       | 100.00            | 10.03                  | 10                       |
| by compound             | afimoxifene | 68392-35-8        | gentamicin | 1                       | 10                        | 0                       | 104.32            | 7.05                   | 10                       |
| by compound             | afimoxifene | 68392-35-8        | gentamicin | 1                       | 0                         | 200                     | 39.46             | 5.77                   | 10                       |
| by compound             | afimoxifene | 68392-35-8        | gentamicin | 1                       | 0.5                       | 200                     | 43.24             | 11.82                  | 10                       |
| by compound             | afimoxifene | 68392-35-8        | gentamicin | 1                       | 1                         | 200                     | 49.63             | 12.40                  | 11                       |
| by compound             | afimoxifene | 68392-35-8        | gentamicin | 1                       | 5                         | 200                     | 60.00             | 10.89                  | 10                       |
| by compound             | afimoxifene | 68392-35-8        | gentamicin | 1                       | 10                        | 200                     | 72.52             | 17.48                  | 12                       |
| by compound             | PPT         | 263717-53-9       | neomycin   | 1                       | 0                         | 0                       | 100.00            | 4.76                   | 12                       |
| by compound             | PPT         | 263717-53-9       | neomycin   | 1                       | 0.5                       | 0                       | 99.38             | 8.19                   | 10                       |
| by compound             | PPT         | 263717-53-9       | neomycin   | 1                       | 1                         | 0                       | 103.80            | 3.56                   | 11                       |
| by compound             | PPT         | 263717-53-9       | neomycin   | 1                       | 5                         | 0                       | 100.44            | 5.57                   | 10                       |
| by compound             | PPT         | 263717-53-9       | neomycin   | 1                       | 10                        | 0                       | 98.85             | 8.28                   | 10                       |
| by compound             | PPT         | 263717-53-9       | neomycin   | 1                       | 0                         | 200                     | 2.40              | 4.94                   | 11                       |
| by compound             | PPT         | 263717-53-9       | neomycin   | 1                       | 0.5                       | 200                     | 5.29              | 6.38                   | 12                       |
| by compound             | PPT         | 263717-53-9       | neomycin   | 1                       | 1                         | 200                     | 6.87              | 7.50                   | 10                       |
| by compound             | PPT         | 263717-53-9       | neomycin   | 1                       | 5                         | 200                     | 3.96              | 6.43                   | 12                       |
| by compound             | PPT         | 263717-53-9       | neomycin   | 1                       | 10                        | 200                     | 1.06              | 2.23                   | 10                       |
| by compound             | DPN         | 1428-67-7         | neomycin   | 1                       | 0                         | 0                       | 100.00            | 5.55                   | 10                       |
| by compound             | DPN         | 1428-67-7         | neomycin   | 1                       | 0.5                       | 0                       | 102.87            | 3.62                   | 11                       |
| by compound             | DPN         | 1428-67-7         | neomycin   | 1                       | 1                         | 0                       | 96.65             | 6.77                   | 11                       |
| by compound             | DPN         | 1428-67-7         | neomycin   | 1                       | 5                         | 0                       | 99.47             | 5.23                   | 10                       |
| by compound             | DPN         | 1428-67-7         | neomycin   | 1                       | 10                        | 0                       | 101.05            | 4.84                   | 10                       |
| by compound             | DPN         | 1428-67-7         | neomycin   | 1                       | 50                        | 0                       | 101.58            | 5.58                   | 10                       |
| by compound             | DPN         | 1428-67-7         | neomycin   | 1                       | 100                       | 0                       | 97.13             | 6.81                   | 11                       |
| by compound             | DPN         | 1428-67-7         | neomycin   | 1                       | 0                         | 200                     | 6.22              | 6.58                   | 11                       |
| by compound             | DPN         | 1428-67-7         | neomycin   | 1                       | 0.5                       | 200                     | 6.70              | 5.81                   | 11                       |
| by compound             | DPN         | 1428-67-7         | neomycin   | 1                       | 1                         | 200                     | 5.26              | 7.44                   | 10                       |
| by compound             | DPN         | 1428-67-7         | neomycin   | 1                       | 5                         | 200                     | 6.84              | 6.10                   | 10                       |
| by compound             | DPN         | 1428-67-7         | neomycin   | 1                       | 10                        | 200                     | 4.78              | 7.61                   | 11                       |
| by compound             | DPN         | 1428-67-7         | neomycin   | 1                       | 50                        | 200                     | 4.74              | 5.79                   | 10                       |
| by compound             | DPN         | 1428-67-7         | neomycin   | 1                       | 100                       | 200                     | 5.26              | 5.55                   | 10                       |

| Experiment <sup>a</sup> | Compound          | Compound<br>CAS # | Toxin    | Toxin                   | Compound                | Toxin                   | Standard          |                        |                          |
|-------------------------|-------------------|-------------------|----------|-------------------------|-------------------------|-------------------------|-------------------|------------------------|--------------------------|
|                         |                   |                   |          | exposure                | concentration           | concentration           | Mean <sup>e</sup> | Deviation <sup>f</sup> | Sample size <sup>g</sup> |
|                         |                   |                   |          | time (hrs) <sup>b</sup> | ( $\mu$ M) <sup>c</sup> | ( $\mu$ M) <sup>d</sup> |                   |                        |                          |
| by compound             | R,R THC           | 138090-06-9       | neomycin | 1                       | 0                       | 0                       | 100.00            | 5.55                   | 10                       |
| by compound             | R,R THC           | 138090-06-9       | neomycin | 1                       | 0.5                     | 0                       | 98.95             | 7.77                   | 10                       |
| by compound             | R,R THC           | 138090-06-9       | neomycin | 1                       | 1                       | 0                       | 103.16            | 4.44                   | 10                       |
| by compound             | R,R THC           | 138090-06-9       | neomycin | 1                       | 5                       | 0                       | 94.74             | 7.85                   | 10                       |
| by compound             | R,R THC           | 138090-06-9       | neomycin | 1                       | 10                      | 0                       | 89.95             | 13.41                  | 11                       |
| by compound             | R,R THC           | 138090-06-9       | neomycin | 1                       | 0                       | 200                     | 6.22              | 6.58                   | 11                       |
| by compound             | R,R THC           | 138090-06-9       | neomycin | 1                       | 0.5                     | 200                     | 1.58              | 2.54                   | 10                       |
| by compound             | R,R THC           | 138090-06-9       | neomycin | 1                       | 1                       | 200                     | 0.53              | 1.66                   | 10                       |
| by compound             | R,R THC           | 138090-06-9       | neomycin | 1                       | 5                       | 200                     | 4.21              | 4.84                   | 10                       |
| by compound             | 17 beta estradiol | 50-28-2           | neomycin | 1                       | 0                       | 0                       | 100.00            | 4.76                   | 12                       |
| by compound             | 17 beta estradiol | 50-28-2           | neomycin | 1                       | 0.5                     | 0                       | 102.03            | 6.13                   | 10                       |
| by compound             | 17 beta estradiol | 50-28-2           | neomycin | 1                       | 1                       | 0                       | 100.44            | 4.98                   | 10                       |
| by compound             | 17 beta estradiol | 50-28-2           | neomycin | 1                       | 5                       | 0                       | 100.92            | 6.45                   | 11                       |
| by compound             | 17 beta estradiol | 50-28-2           | neomycin | 1                       | 10                      | 0                       | 103.08            | 3.56                   | 12                       |
| by compound             | 17 beta estradiol | 50-28-2           | neomycin | 1                       | 50                      | 0                       | 99.38             | 6.50                   | 10                       |
| by compound             | 17 beta estradiol | 50-28-2           | neomycin | 1                       | 100                     | 0                       | 95.15             | 7.48                   | 10                       |
| by compound             | 17 beta estradiol | 50-28-2           | neomycin | 1                       | 0                       | 200                     | 2.40              | 4.94                   | 11                       |
| by compound             | 17 beta estradiol | 50-28-2           | neomycin | 1                       | 0.5                     | 200                     | 1.44              | 2.47                   | 11                       |
| by compound             | 17 beta estradiol | 50-28-2           | neomycin | 1                       | 1                       | 200                     | 6.25              | 7.02                   | 11                       |
| by compound             | 17 beta estradiol | 50-28-2           | neomycin | 1                       | 5                       | 200                     | 8.81              | 8.53                   | 12                       |
| by compound             | 17 beta estradiol | 50-28-2           | neomycin | 1                       | 10                      | 200                     | 16.82             | 10.79                  | 11                       |
| by compound             | 17 beta estradiol | 50-28-2           | neomycin | 1                       | 50                      | 200                     | 17.97             | 11.47                  | 10                       |
| by compound             | 17 beta estradiol | 50-28-2           | neomycin | 1                       | 100                     | 200                     | 20.62             | 18.56                  | 10                       |
| by compound             | fulvestrant       | 129453-61-8       | neomycin | 1                       | 0                       | 0                       | 100.00            | 5.66                   | 10                       |
| by compound             | fulvestrant       | 129453-61-8       | neomycin | 1                       | 0.5                     | 0                       | 95.19             | 7.04                   | 10                       |
| by compound             | fulvestrant       | 129453-61-8       | neomycin | 1                       | 1                       | 0                       | 99.66             | 5.49                   | 11                       |
| by compound             | fulvestrant       | 129453-61-8       | neomycin | 1                       | 5                       | 0                       | 94.65             | 5.66                   | 10                       |
| by compound             | fulvestrant       | 129453-61-8       | neomycin | 1                       | 10                      | 0                       | 101.60            | 5.86                   | 11                       |
| by compound             | fulvestrant       | 129453-61-8       | neomycin | 1                       | 50                      | 0                       | 95.77             | 5.05                   | 11                       |
| by compound             | fulvestrant       | 129453-61-8       | neomycin | 1                       | 100                     | 0                       | 97.72             | 6.37                   | 11                       |
| by compound             | fulvestrant       | 129453-61-8       | neomycin | 1                       | 0                       | 200                     | 13.13             | 9.67                   | 11                       |
| by compound             | fulvestrant       | 129453-61-8       | neomycin | 1                       | 0.5                     | 200                     | 13.90             | 5.75                   | 10                       |
| by compound             | fulvestrant       | 129453-61-8       | neomycin | 1                       | 1                       | 200                     | 8.02              | 6.30                   | 10                       |
| by compound             | fulvestrant       | 129453-61-8       | neomycin | 1                       | 5                       | 200                     | 14.26             | 6.17                   | 12                       |
| by compound             | fulvestrant       | 129453-61-8       | neomycin | 1                       | 10                      | 200                     | 19.79             | 5.07                   | 10                       |
| by compound             | fulvestrant       | 129453-61-8       | neomycin | 1                       | 50                      | 200                     | 16.04             | 9.43                   | 10                       |
| by compound             | fulvestrant       | 129453-61-8       | neomycin | 1                       | 100                     | 200                     | 11.23             | 7.33                   | 10                       |

a "Experiment" refers to the type of experiment, either "by compound," in which the protective compound concentration was varied, or "by toxin," in which the concentration of toxin was varied.

b "Toxin exposure time" is the time in hours that larvae were exposed to toxin. All larvae received a protective compound pretreatment of 1 hr.

c "Compound concentration" is the concentration of protective compound to which larvae were exposed.

d "Toxin concentration" is the concentration of toxin that to which larvae were exposed.

e This refers to the mean of the DASPEI scores normalized to untreated control larvae.

f This refers to the standard deviation of the DASPEI scores normalized to the mean of the untreated control larvae.

g "Sample size" is the number of larvae treated in each case.
